# Supplementary material for: Unveiling the Potential of Ent-Kaurane Diterpenoids: Multifaceted Natural Products for Drug Discovery
Source: MDPI journal article supplement (doi:10.3390/ph17040510), 2024-04-16
Supplement: s1 [file s1]

# Unveiling the Potential of *Ent*-kaurane Diterpenoids: Multifaceted Natural Products for Drug Discovery

Shadrack Kibet <sup>1,2</sup>, Njogu M. Kimani <sup>1,3\*</sup>, Syombua S. Mwanza <sup>1,2</sup>, Cynthia Muhavi Mudalungu <sup>2,4\*</sup>, Cleydson B. R. Santos <sup>5,6</sup> and Chrysantus Mbi Tanga <sup>2\*</sup>

<sup>1</sup> University of Embu, Department of Physical Sciences, P.O Box 6-60100, Embu, Kenya.

<sup>2</sup> International Centre of Insects Physiology and Ecology, P.O Box 30772-00100, Nairobi, Kenya.

<sup>3</sup> Natural Product Chemistry and Computational Drug Discovery Laboratory, P.O. Box 6-60100, Embu, Kenya.

<sup>4</sup> School of Chemistry and Material Science, The Technical University of Kenya, P.O Box 52428-00200, Nairobi, Kenya.

<sup>5</sup> Graduate Program in Medicinal Chemistry and Molecular Modelling, Health Science Institute, Federal University of Pará, Belém 66075-110, PA, Brazil.

<sup>6</sup> Laboratory of Modelling and Computational Chemistry, Department of Biological and Health Sciences, Federal University of Amapá, Macapá 68902-280, AP, Brazil.

\* Correspondence: 1. Cynthia M. Mudalungu; [cmudalungu@icipe.org](mailto:cmudalungu@icipe.org); Tel.: +254714971792

2. Njogu M. Kimani; [njogu.mark@embuni.ac.ke](mailto:njogu.mark@embuni.ac.ke); Tel.: +254728132596

3. Chrysantus M. Tanga; [ctanga@icipe.org](mailto:ctanga@icipe.org); Tel.: +254702729931

## Supporting Information

**Citation:** To be added by editorial staff during production.

Academic Editor: First-name Lastname

Received: date

Revised: date

Accepted: date

Published: date

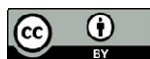

**Copyright:** © 2024 by the authors. Submitted for possible open access publication under the terms and conditions of the Creative Commons Attribution (CC BY) license

(<https://creativecommons.org/licenses/by/4.0/>).

---

SUPPLEMENTARY INFORMATION S1: Chemical Structures of *ent*-kaurane diterpenoids

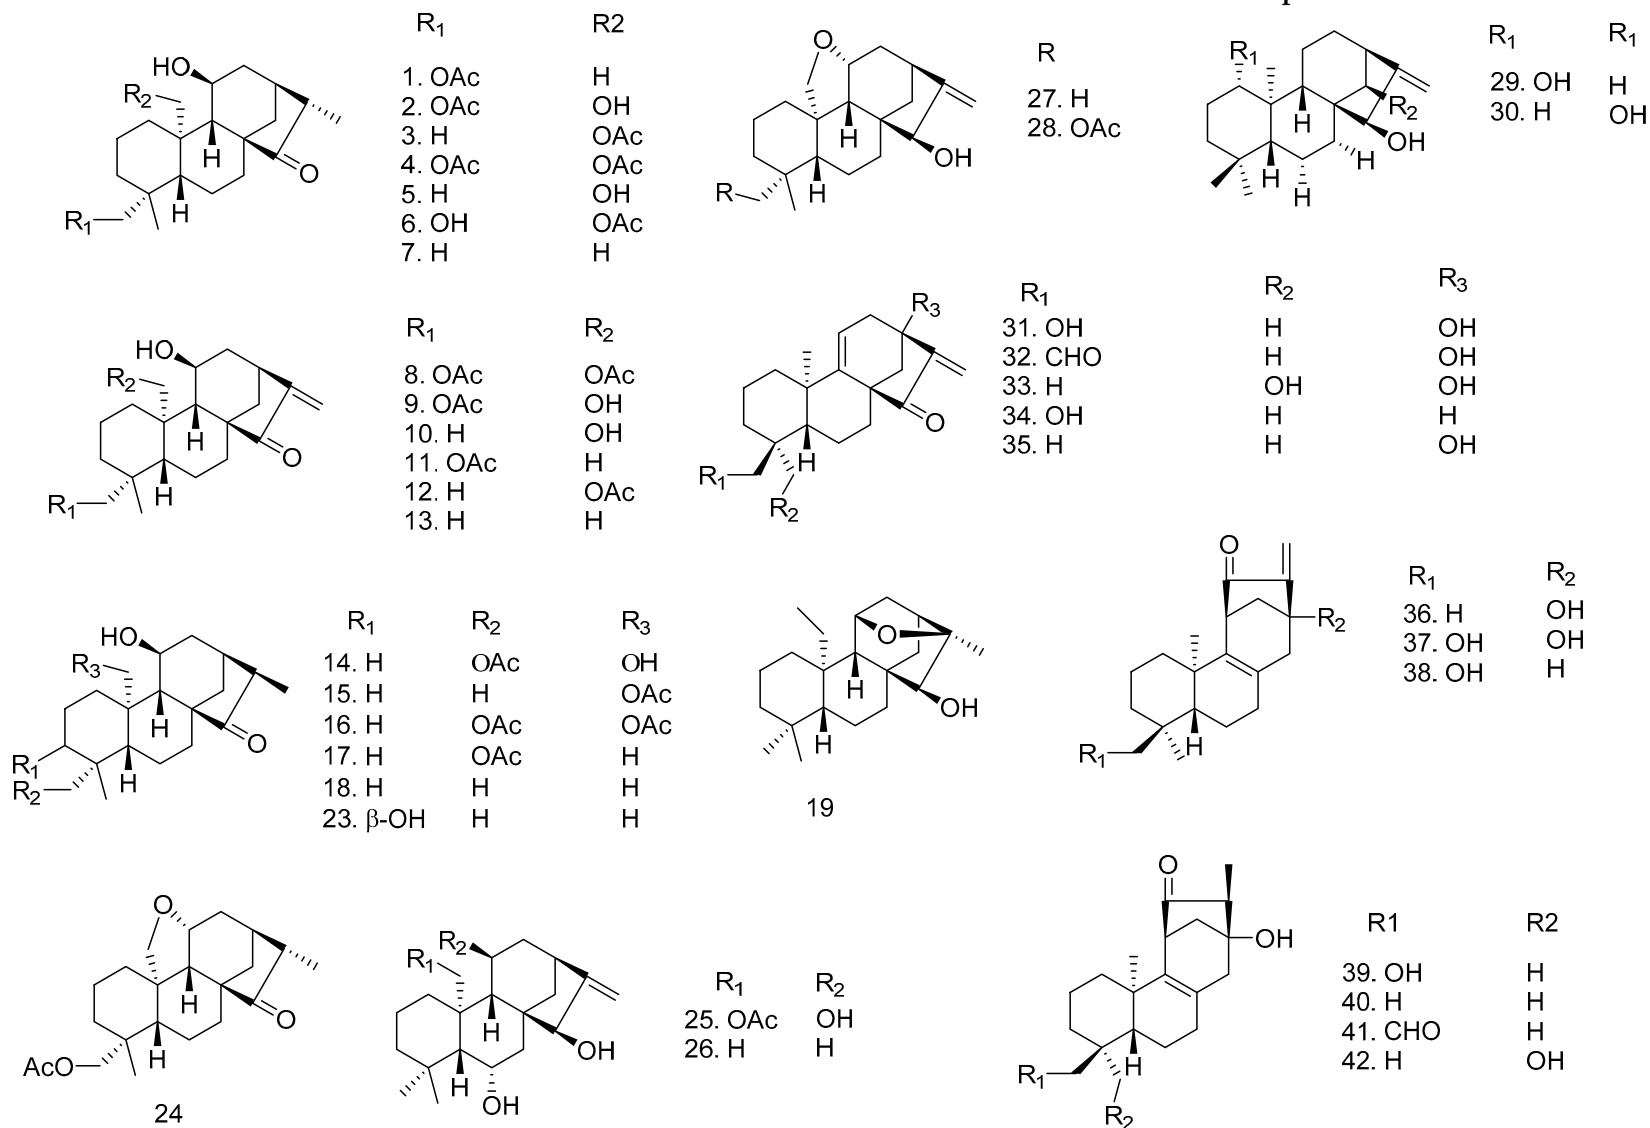

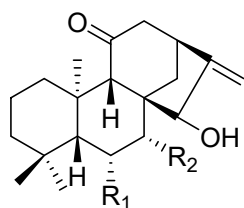

R1  
43. OH  
44. OH  
45. H  
46. H

R2  
H  
OH  
OH  
H

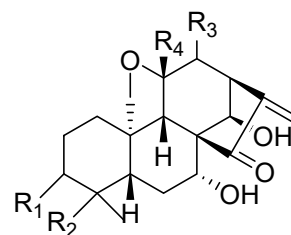

| R <sub>1</sub> | R <sub>2</sub> | R <sub>3</sub> | R <sub>4</sub> |
|----------------|----------------|----------------|----------------|
| 56. β-OAc      | Me             | α-OH           | OH             |
| 58. H          | β-CHO          | H              | OMe            |
| 59. H          | Me             | H              | OH             |

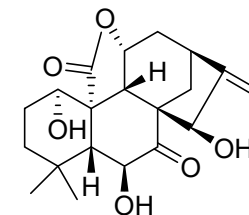

60

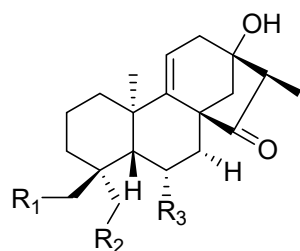

R<sub>1</sub>  
47. H  
48. OH  
49. CHO  
50. H  
51. OH

| R <sub>2</sub> | R <sub>3</sub> |
|----------------|----------------|
| H              | H              |
| H              | H              |
| H              | H              |
| OH             | H              |
| H              | OH             |

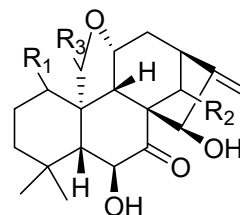

| R <sub>1</sub> | R <sub>2</sub> | R <sub>3</sub> |
|----------------|----------------|----------------|
| 61. α-OH       | H              | β-OH           |
| 62. 2H         | β-OH           | H              |
| 63. α-O        | H              | β-Me           |

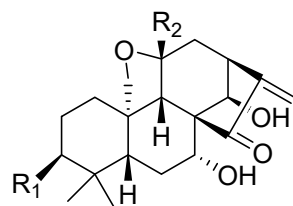

R<sub>1</sub>  
52. OAc  
53. OAc

R<sub>2</sub>  
OMe  
OH

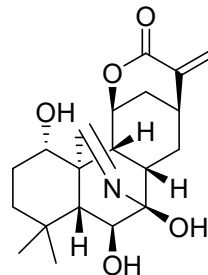

64

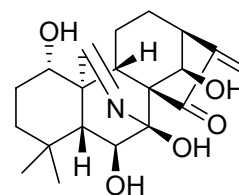

65

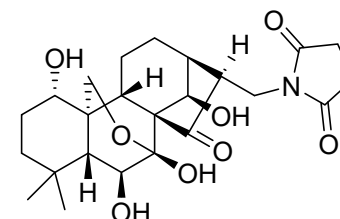

66

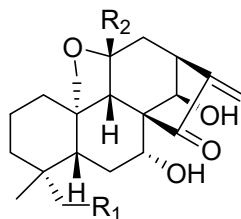

R<sub>1</sub>  
54. OAc  
55. OAc

R<sub>2</sub>  
OMe  
OH

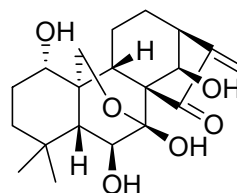

67

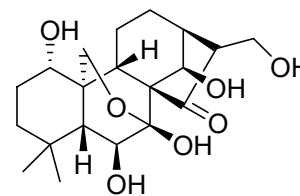

68

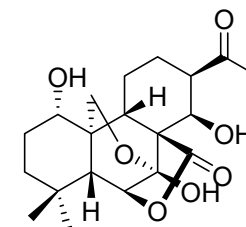

69

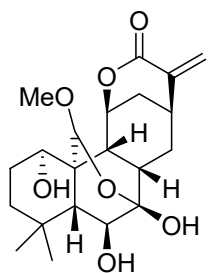

70

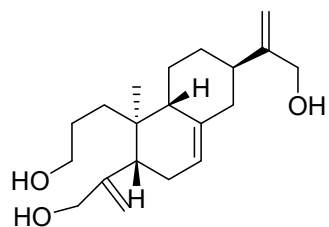

74

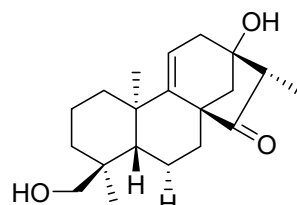

79

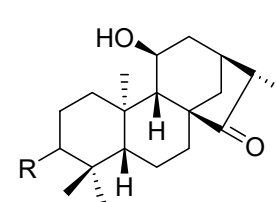

R  
87.  $\alpha$ -OH  
88.  $\beta$ -OH  
89. 2H

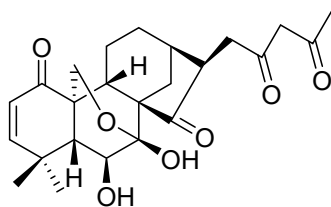

71

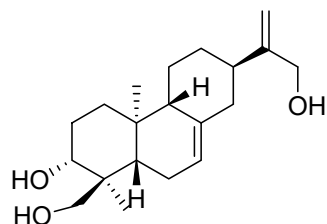

75

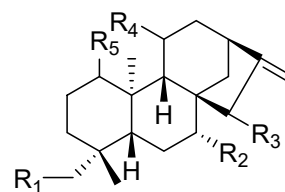

| R <sub>1</sub>         | R <sub>2</sub> | R <sub>3</sub> | R <sub>4</sub> | R <sub>5</sub> |
|------------------------|----------------|----------------|----------------|----------------|
| 80. 3H                 | H              | $\beta$ -OH    | H              | $\alpha$ -OH   |
| 81. 3H                 | H              | $\alpha$ -OH   | H              | $\alpha$ -OH   |
| 82. 3H                 | OH             | H              | H              | $\alpha$ -OH   |
| 83. 3H                 | OAc            | H              | H              | $\alpha$ -OH   |
| 84. 3H                 | Me             | $\beta$ -OH    | $\alpha$ -OH   | 2H             |
| 85. 3H                 | Me             | $\beta$ -OH    | $\alpha$ -OH   | 2H             |
| 86. CH <sub>2</sub> OH | Me             | $\beta$ -OH    | $\alpha$ -H    | 2H             |

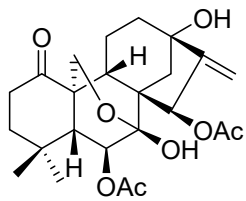

72

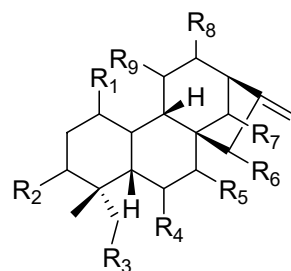

| R <sub>1</sub>    | R <sub>2</sub> | R <sub>3</sub> | R <sub>4</sub> | R <sub>5</sub> | R <sub>6</sub> | R <sub>7</sub> | R <sub>8</sub> | R <sub>9</sub> |
|-------------------|----------------|----------------|----------------|----------------|----------------|----------------|----------------|----------------|
| 76. $\alpha$ -H   | H              | H              | $\alpha$ -H    | $\alpha$ -OH   | $\beta$ -OH    | $\beta$ -H     | H              | H              |
| 77. $\alpha$ -OH  | H              | H              | $\alpha$ -OH   | $\alpha$ -H    | $\beta$ -OH    | $\beta$ -H     | H              | H              |
| 78. $\alpha$ -H   | H              | H              | $\alpha$ -H    | $\alpha$ -H    | $\beta$ -OH    | $\beta$ -H     | H              | H              |
| 272. $\alpha$ -H  | $\beta$ -OAc   | H              | H              | $\alpha$ -OH   | =O             | $\beta$ -OH    | $\alpha$ -OH   | H              |
| 273. $\alpha$ -H  | H              | OAc            | $\alpha$ -OH   | $\alpha$ -OH   | =O             | $\beta$ -H     | H              | $\alpha$ -H    |
| 278. $\alpha$ -OH | $\beta$ -H     | H              | H              | $\alpha$ -OH   | =O             | $\beta$ -OH    | $\alpha$ -OAc  | H              |

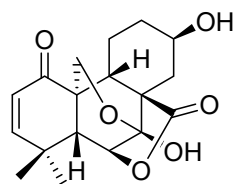

73

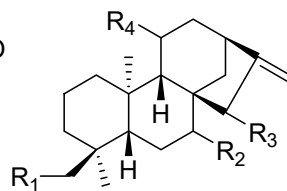

| R <sub>1</sub> | R <sub>2</sub> | R <sub>3</sub> | R <sub>4</sub> |
|----------------|----------------|----------------|----------------|
| 90. H          | H              | =O             | $\beta$ -OH    |
| 91. H          | H              | $\beta$ -OH    | $\beta$ -OH    |
| 92. COOH       | H              | $\beta$ -OAc   | H              |
| 93. COOH       | H              | H              | H              |
| 95. H          | $\alpha$ -OH   | $\alpha$ -OH   | H              |
| 96. H          | $\alpha$ -OH   | H              | H              |

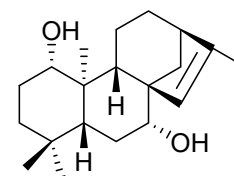

94

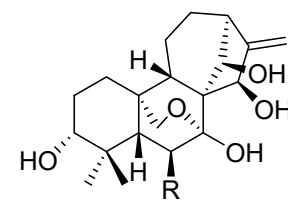

R  
109. OH  
113. OAc

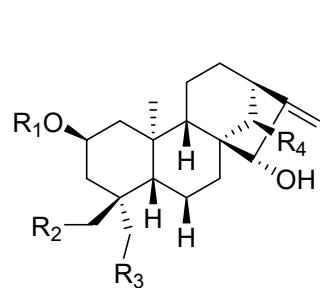

| R <sub>1</sub> | R <sub>2</sub> | R <sub>3</sub> | R <sub>4</sub> |
|----------------|----------------|----------------|----------------|
| 97. H          | H              | H              | H              |
| 98. Glc        | H              | H              | H              |
| 99. H          | MeOH           | H              | H              |
| 100. Glc       | MeOH           | H              | H              |
| 101. Glc       | H              | MeOH           | H              |
| 102. H         | H              | H              | H              |
| 103. H         | H              | H              | OH             |
| 104. Glc       | H              | H              | OH             |

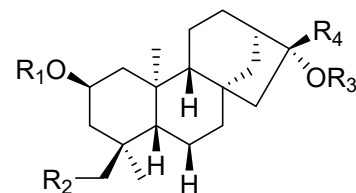

| R <sub>1</sub> | R <sub>2</sub> | R <sub>3</sub> | R <sub>4</sub> |
|----------------|----------------|----------------|----------------|
| 105. H         | H              | H              | Me             |
| 106. Glc       | H              | Glc            | Me             |
| 107. H         | OH             | H              | Me             |
| 108. Glc       | H              | H              | MeOH           |

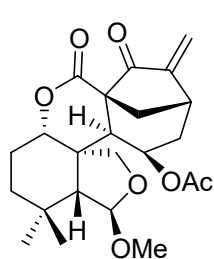

110

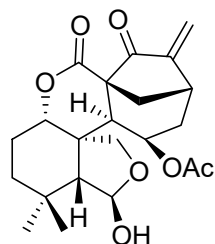

114

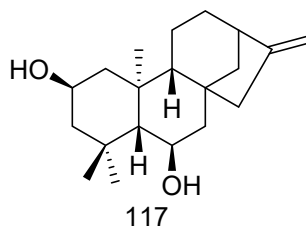

117

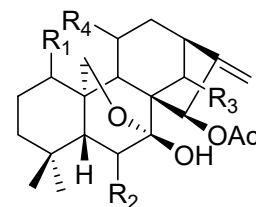

| R <sub>1</sub> | R <sub>2</sub> | R <sub>3</sub> | R <sub>4</sub> |
|----------------|----------------|----------------|----------------|
| 122. H         | β-OAc          | β-OAc          | H              |
| 123. H         | β-OH           | β-OAc          | β-OH           |
| 124. β-OH      | β-OH           | β-OAc          | H              |
| 169. α-OH      | β-OH           | H              | β-OGlc         |
| 170. α-OGlc    | β-OH           | β-OH           | H              |
| 171. α-OGlc    | β-OH           | H              | H              |
| 172. H         | β-OGlc         | α-OH           | β-OH           |
| 173. α-OGlc    | β-OH           | H              | β-OH           |
| 174. α-OGlc    | β-OH           | α-OH           | H              |

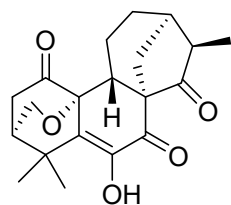

111

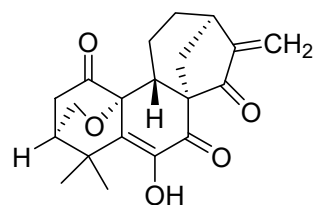

115

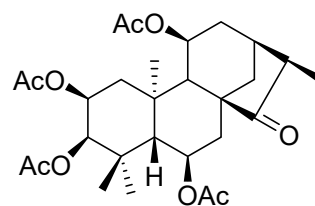

121

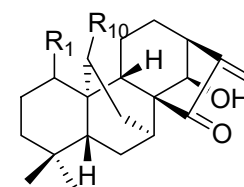

| R <sub>1</sub> | R <sub>2</sub> |
|----------------|----------------|
| 165. α-OH      | OEt            |
| 166. α-OH      | OMe            |

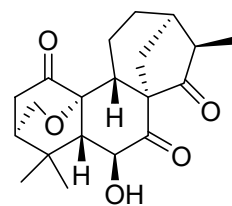

112

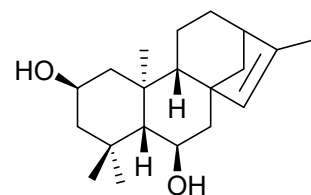

116

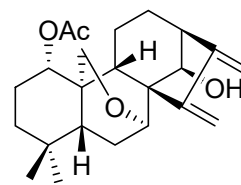

162

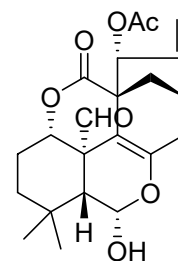

177

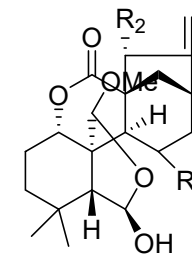

| R <sub>1</sub> | R <sub>2</sub> |
|----------------|----------------|
| 178. H         | OAc            |
| 179. α-OH      | OAc            |
| 180. α-OH      | OH             |

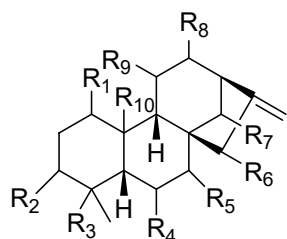

| R <sub>1</sub> | R <sub>2</sub> | R <sub>3</sub> | R <sub>4</sub> | R <sub>5</sub> | R <sub>6</sub> | R <sub>7</sub> | R <sub>8</sub> | R <sub>9</sub> | R <sub>10</sub> |
|----------------|----------------|----------------|----------------|----------------|----------------|----------------|----------------|----------------|-----------------|
| 20. H          | β-H            | α-Me           | H              | H              | β-OH           | H              | H              | β-OH           | α-Me            |
| 21. H          | β-H            | α-Me           | H              | H              | β-OH           | H              | H              | β-OH           | α-Me            |
| 22. H          | β-OAc          | α-Me           | H              | H              | β-OH           | H              | H              | β-OH           | α-Me            |
| 125. H         | H              | β-MeOH         | H              | α-OAc          | =O             | β-OH           | α-OH           | H              | α-Me            |
| 126. H         | H              | β-MeOH         | H              | α-OH           | =O             | β-OAc          | α-OH           | H              | α-Me            |
| 127. H         | H              | β-OAc          | H              | α-OAc          | =O             | β-OH           | α-OH           | H              | α-Me            |
| 128. H         | H              | β-OH           | H              | α-OH           | =O             | β-H            | α-OH           | H              | α-Me            |
| 129. H         | H              | β-OH           | H              | α-OH           | =O             | β-OH           | α-OH           | H              | α-Me            |
| 130. H         | α-OH           | Me             | H              | α-OH           | =O             | β-OH           | α-OH           | β-OH           | α-Me            |
| 131. H         | α-OH           | β-MeOH         | H              | α-OH           | =O             | β-OH           | α-OH           | β-OH           | α-Me            |
| 132. H         | =O             | β-MeOH         | H              | α-H            | β-OH           | β-H            | H              | β-H            | α-Me            |
| 133. H         | OH             | β-MeOH         | H              | α-H            | =O             | β-H            | α-OH           | β-H            | α-Me            |
| 134. H         | α-H            | Me             | H              | α-OAc          | β-OH           | β-OH           | α-OH           | β-H            | α-Me            |
| 135. H         | α-H            | Me             | α-OH           | α-H            | =O             | β-OH           | α-H            | β-OH           | α-Me            |
| 136. H         | α-H            | Me             | =O             | α-H            | =O             | β-OH           | α-H            | β-OH           | α-Me            |
| 137. H         | H              | β-MeCOH        | H              | α-H            | =O             | β-OH           | α-OH           | H              | α-Me            |
| 138. H         | H              | β-MeOH         | H              | α-H            | β-OH           | β-H            | α-OH           | H              | α-Me            |
| 139. H         | H              | β-MeOH         | H              | =O             | β-OH           | β-OH           | H              | β-H            | α-Me            |
| 140. H         | H              | β-MeOH         | H              | α-OH           | =O             | β-OH           | α-OH           | H              | α-MeOH          |
| 141. H         | H              | β-MeOH         | H              | H              | =O             | β-OH           | H              | H              | α-CHO           |
| 142. H         | H              | β-MeOH         | H              | α-OH           | =O             | H              | H              | H              | α-MeOH          |
| 143. α-OAc     | β-OH           | Me             | α-OAc          | β-OAc          | β-OH           | H              | H              | β-OAc          | α-Me            |
| 144. α-OAc     | β-OH           | Me             | =O             | β-OAc          | β-OH           | H              | H              | β-OAc          | α-Me            |
| 145. α-OAc     | β-OH           | Me             | =O             | β-OH           | β-OAc          | H              | H              | β-OAc          | α-Me            |
| 146. α-OAc     | β-OH           | Me             | =O             | β-OH           | β-OH           | H              | H              | β-OAc          | α-Me            |
| 147. α-OAc     | β-OH           | Me             | =O             | β-OH           | β-OH           | H              | H              | β-OAc          | α-Me            |
| 148. H         | H              | Me             | H              | α-OAc          | =O             | β-OH           | α-OH           | β-OH           | α-Me            |
| 149. H         | H              | Me             | H              | α-OH           | =O             | β-OH           | α-OH           | H              | α-Me            |
| 150. H         | H              | Me             | H              | α-OH           | =O             | β-OH           | H              | β-OH           | α-Me            |
| 161. α-OH      | H              | β-MeOAc        | H              | α-OH           | =O             | β-OH           | α-OH           | H              | H               |
| 163. α-OH      | H              | Me             | H              | α-OH           | =O             | β-OH           | α-OH           | β-OH           | α-Me            |
| 164. α-OH      | H              | Me             | H              | α-OH           | =O             | β-OH           | α-OH           | β-OH           | α-Me            |
| 202. H         | H              | β-MeOH         | H              | H              | =O             | β-OH           | α-OH           | H              | α-Me            |
| 203. H         | H              | β-MeOH         | H              | α-OH           | =O             | β-OH           | H              | β-OH           | α-Me            |
| 204. α-OAc     | H              | β-CHO          | H              | α-OH           | =O             | β-OH           | α-OH           | H              | α-Me            |
| 205. α-OAc     | H              | Me             | H              | α-OH           | =O             | β-OH           | α-OH           | β-OH           | α-Me            |
| 206. H         | H              | β-MeOH         | H              | α-OH           | α-OAc          | β-OH           | H              | H              | H               |
| 207. α-OAc     | β-OH           | β-MeOH         | H              | α-OH           | =O             | β-OH           | =O             | H              | H               |
| 208. α-OH      | H              | β-Me           | H              | α-OH           | =O             | β-OH           | H              | H              | α-MeOAc         |

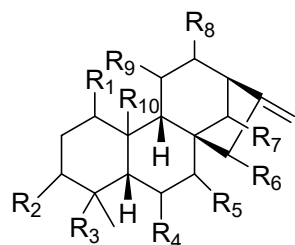

|                    |              |               |    |              |              |             |              |              |                 |
|--------------------|--------------|---------------|----|--------------|--------------|-------------|--------------|--------------|-----------------|
| 209. $\alpha$ -OAc | H            | $\beta$ -MeOH | H  | $\alpha$ -OH | =O           | $\beta$ -OH | H            | H            | $\alpha$ -MeOAc |
| 210. $\alpha$ -OH  | H            | $\beta$ -Me   | H  | $\alpha$ -OH | =O           | $\beta$ -OH | H            | H            | $\alpha$ -MeOAc |
| 211. $\alpha$ -H   | H            | $\beta$ -Me   | H  | $\alpha$ -OH | =O           | $\beta$ -OH | H            | H            | $\alpha$ -Me    |
| 215. $\alpha$ -OH  | $\alpha$ -OH | Me            | H  | H            | =O           | H           | H            | $\beta$ -OH  | $\alpha$ -Me    |
| 216. $\alpha$ -OAc | $\beta$ -OH  | Me            | H  | H            | $\beta$ -OH  | H           | H            | $\beta$ -OH  | $\alpha$ -Me    |
| 217. $\alpha$ -OAc | $\beta$ -OH  | Me            | H  | =O           | $\beta$ -OAc | H           | H            | $\beta$ -OAc | $\alpha$ -Me    |
| 218. $\alpha$ -OH  | $\beta$ -OH  | Me            | H  | H            | $\beta$ -OH  | H           | H            | $\beta$ -OAc | $\alpha$ -Me    |
|                    | $\beta$ -OH  | Me            | =O | $\beta$ -OH  | $\beta$ -OH  | H           | H            | $\beta$ -OH  | $\alpha$ -Me    |
|                    | $\beta$ -OH  | Me            | =O | $\beta$ -OH  | $\beta$ -OH  | H           | H            | $\beta$ -OH  | $\alpha$ -Me    |
|                    | $\beta$ -OH  | Me            | =O | $\beta$ -OH  | $\beta$ -OH  | H           | H            | $\beta$ -OAc | $\alpha$ -Me    |
|                    | $\beta$ -OH  | Me            | =O | $\beta$ -OH  | $\beta$ -OH  | H           | H            | $\beta$ -OH  | $\alpha$ -Me    |
|                    | $\beta$ -OH  | Me            | =O | $\beta$ -OH  | $\beta$ -OH  | H           | H            | $\beta$ -OH  | $\alpha$ -Me    |
|                    | $\beta$ -OH  | Me            | =O | $\beta$ -OH  | $\beta$ -OH  | H           | H            | $\beta$ -OH  | $\alpha$ -Me    |
|                    | $\beta$ -OH  | Me            | =O | $\beta$ -OH  | $\beta$ -OH  | H           | H            | $\beta$ -OAc | $\alpha$ -Me    |
|                    | $\beta$ -OH  | Me            | =O | $\beta$ -OH  | $\beta$ -OH  | H           | H            | =O           | $\alpha$ -Me    |
|                    | $\beta$ -OH  | Me            | =O | $\beta$ -OH  | =O           | H           | H            | $\beta$ -OAc | $\alpha$ -Me    |
|                    | $\beta$ -H   | Me            | =O | $\beta$ -OH  | =O           | H           | $\alpha$ -OH | $\beta$ -OH  | $\alpha$ -Me    |
|                    | $\beta$ -OAc | Me            | H  | $\beta$ -OAc | =O           | H           | H            | $\beta$ -OH  | $\alpha$ -Me    |
|                    | $\beta$ -OH  | Me            | H  | $\beta$ -OAc | =O           | H           | H            | $\beta$ -OH  | $\alpha$ -Me    |
|                    | $\beta$ -OH  | Me            | H  | $\beta$ -OAc | $\beta$ -OH  | H           | H            | $\beta$ -OAc | $\alpha$ -Me    |
|                    | $\beta$ -OAc | Me            | H  | $\beta$ -OAc | $\beta$ -OH  | H           | H            | $\beta$ -OH  | $\alpha$ -Me    |

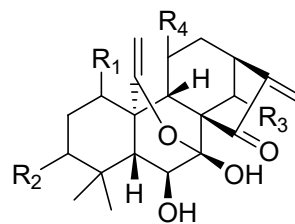

| R <sub>1</sub>     | R <sub>2</sub> | R <sub>3</sub> | R <sub>4</sub> |
|--------------------|----------------|----------------|----------------|
| 181. H             | H              | $\beta$ -OAc   | $\beta$ -OAc   |
| 193. H             | $\beta$ -H     | $\beta$ -OH    | $\alpha$ -OH   |
| 194. $\alpha$ -OAc | $\beta$ -H     | $\beta$ -OH    | $\alpha$ -OH   |
| 195. $\alpha$ -OH  | $\beta$ -H     | $\beta$ -OH    | H              |
| 196. $\alpha$ -OH  | $\beta$ -H     | $\beta$ -OH    | $\alpha$ -OAc  |

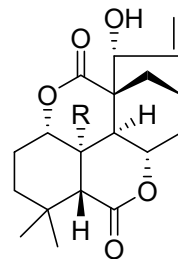

| R        |
|----------|
| 176. OH  |
| 192. CHO |

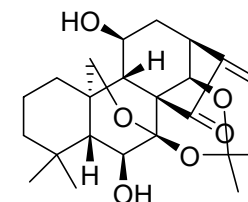

201

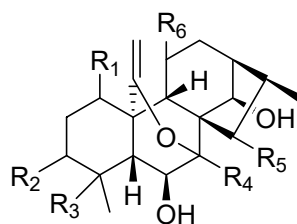

| R <sub>1</sub>   | R <sub>2</sub> | R <sub>3</sub>  | R <sub>4</sub> |
|------------------|----------------|-----------------|----------------|
| 182. $\beta$ -OH | H              | $\alpha$ -MeCHO | $\beta$ -OH    |
| 183. $\beta$ -OH | $\beta$ -OH    | $\alpha$ -MeCHO | $\beta$ -H     |
| 184. H           | $\beta$ -H     | Me              | $\beta$ -H     |
| 185. H           | $\beta$ -H     | Me              | $\beta$ -H     |

| R <sub>5</sub> | R <sub>6</sub> |
|----------------|----------------|
| =O             | H              |
| =O             | H              |
| $\beta$ -OH    | $\beta$ -OH    |
| $\beta$ -OH    | H              |

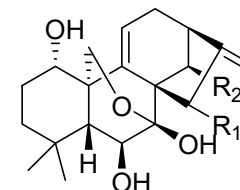

| R <sub>1</sub> | R <sub>2</sub> |
|----------------|----------------|
| 186. b-OH      | b-OH           |
| 187. =O        | b-H            |

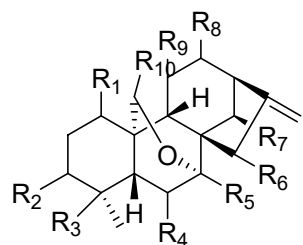

|      | R <sub>1</sub> | R <sub>2</sub> | R <sub>3</sub> | R <sub>4</sub> | R <sub>5</sub> | R <sub>6</sub> | R <sub>7</sub> | R <sub>8</sub> | R <sub>9</sub> | R <sub>10</sub> |
|------|----------------|----------------|----------------|----------------|----------------|----------------|----------------|----------------|----------------|-----------------|
| 167. | α-OH           | H              | β-Me           | H              | H              | =O             | β-OH           | H              | H              | OMe             |
| 168. | α-OH           | H              | β-Me           | β-OH           | β-OH           | =O             | β-OH           | H              | H              | H               |
| 175. | α-OH           | H              | β-Me           | β-OH           | β-OH           | β-OH           | α-OH           | H              | H              | H               |
| 188. | α-OH           | H              | Me             | β-OH           | β-OH           | =O             | β-OH           | H              | β-H            | α-OEt           |
| 189. | α-OH           | H              | Me             | β-OH           | β-OH           | =O             | β-OH           | H              | H              | β-OEt           |
| 190. | α-OH           | H              | Me             | β-OH           | β-OH           | =O             | β-OH           | H              | H              | β-OBu           |
| 191. | α-OH           | H              | Me             | =O             | β-OH           | =O             | β-OH           | H              | H              | OH              |
| 197. | α-OH           | β-H            | Me             | β-OH           | β-OH           | β-OH           | β-OH           | H              | H              | =O              |
| 198. | α-OH           | H              | Me             | β-OH           | β-OH           | =O             | β-OH           | H              | β-H            | β-OMe           |
| 199. | α-OH           | H              | Me             | β-OH           | β-OH           | =O             | β-OH           | H              | β-H            | α-OMe           |
| 200. | α-OMe          | H              | Me             | β-OH           | β-OH           | β-OH           | β-OH           | H              | β-H            | OMe             |
| 230. | H              | H              | β-Me           | β-OAc          | β-OH           | β-OH           | H              | b-OH           | H              | H               |
| 234. | H              | H              | β-Me           | β-OAc          | β-OH           | β-OH           | H              | H              | H              | H               |
| 235. | H              | H              | β-Me           | β-OH           | β-OH           | =O             | H              | α-OAc          | H              | H               |
| 236. | α-OH           | H              | β-Me           | β-OH           | β-OH           | β-OAc          | H              | H              | β-OH           | H               |
| 238. | H              | H              | β-Me           | β-OH           | β-OH           | β-OH           | H              | β-OH           | H              | H               |
| 239. | H              | H              | β-Me           | β-OAc          | β-OH           | β-OH           | β-OH           | H              | H              | H               |
| 240. | b-OH           | H              | β-Me           | β-OAc          | β-OH           | β-OAc          | β-OH           | H              | H              | H               |
| 249. | α-OH           | H              | β-Me           | β-OH           | β-OH           | =O             | H              | H              | α-OH           | H               |

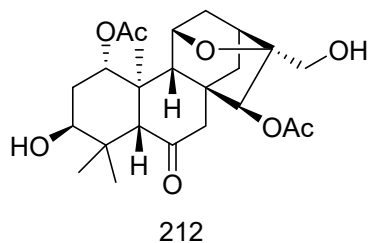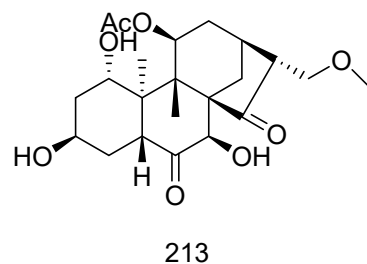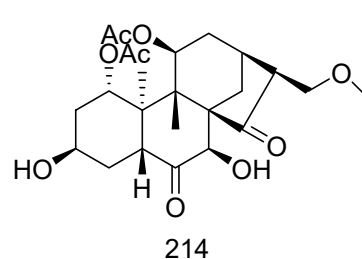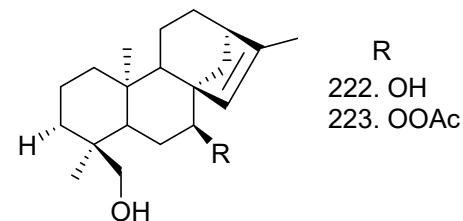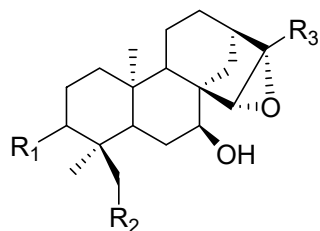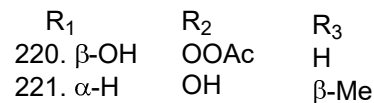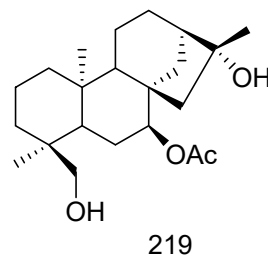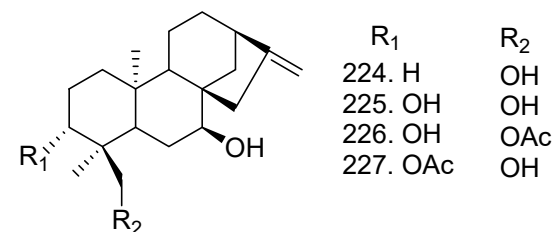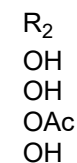



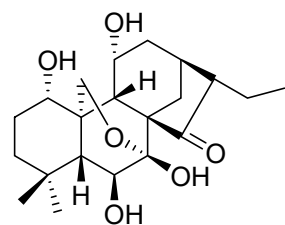

228

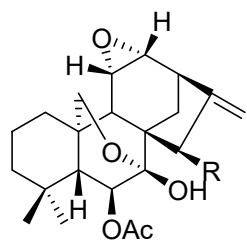

R  
231. OAc  
243. OH

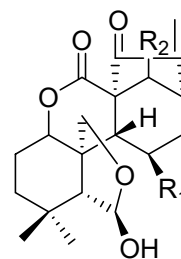

232

|                |                |
|----------------|----------------|
| R <sub>1</sub> | R <sub>2</sub> |
| 232. OAc       | H              |
| 237. OH        | H              |
| 248. H         | α-OH           |

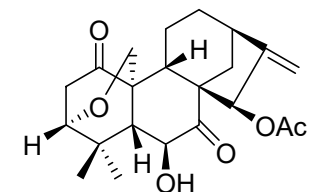

233

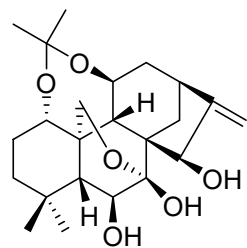

246

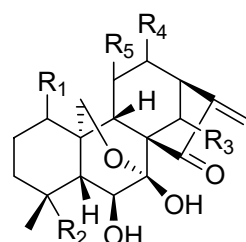

|                |                |                |                |                |
|----------------|----------------|----------------|----------------|----------------|
| R <sub>1</sub> | R <sub>2</sub> | R <sub>3</sub> | R <sub>4</sub> | R <sub>5</sub> |
| 229. H         | α-MeOAc        | α-OH           | α-OH           | H              |
| 245. α-OH      | α-MeOAc        | H              | H              | α-OH           |
| 247. H         | α-MeOAc        | H              | α-OH           | H              |
| 251. H         | α-MeOAc        | β-OH           | H              | H              |
| 267. α-OAc     | α-MeOAc        | β-OH           | H              | α-H            |
| 268. α-OH      | α-MeOAc        | β-H            | H              | α-OAc          |

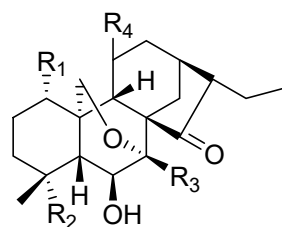

|                |                |                |                |
|----------------|----------------|----------------|----------------|
| R <sub>1</sub> | R <sub>2</sub> | R <sub>3</sub> | R <sub>4</sub> |
| 242. H         | MeOAc          | β-OH           | α-OAc          |
| 250. OH        | Me             | H              | β-OH           |

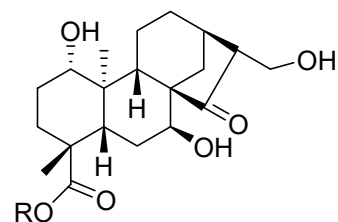

R  
257. H  
262. Me

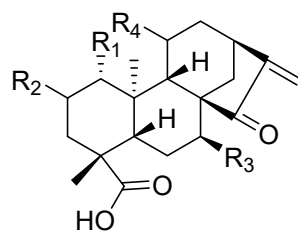

|                |                |                |                |
|----------------|----------------|----------------|----------------|
| R <sub>1</sub> | R <sub>2</sub> | R <sub>3</sub> | R <sub>4</sub> |
| 252. OH        | α-H            | OH             | β-H            |
| 253. H         | α-H            | OH             | β-H            |
| 254. =O        | H              | OH             | H              |
| 255. H         | α-H            | OH             | β-OH           |
| 256. OH        | α-OH           | OH             | β-H            |
| 263. OAc       | α-H            | OH             | β-H            |
| 264. OAc       | α-H            | OAc            | β-H            |

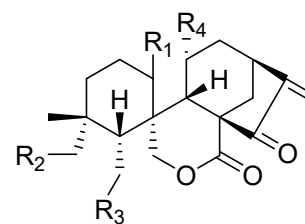

|                |                |                |                |
|----------------|----------------|----------------|----------------|
| R <sub>1</sub> | R <sub>2</sub> | R <sub>3</sub> | R <sub>4</sub> |
| 241. H         | H              | CHO            | α-OH           |
| 244. α-OAc     | H              | CHO            | β-OH           |
| 269. α-Me      | OAc            | OH             | α-H            |
| 270. α-Me      | OH             | OH             | α-H            |
| 271. α-Me      | OAc            | CHO            | α-H            |
| 281. α-Me      | OAc            | CHO            | α-OH           |

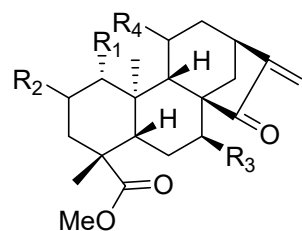

| R <sub>1</sub>     | R <sub>2</sub> | R <sub>3</sub> | R <sub>4</sub> |
|--------------------|----------------|----------------|----------------|
| 258. $\alpha$ -OH  | $\alpha$ -H    | $\beta$ -OH    | $\beta$ -H     |
| 259. $\alpha$ -H   | $\alpha$ -H    | $\beta$ -OH    | $\beta$ -H     |
| 260. =O            | H              | $\beta$ -OH    | H              |
| 261. $\alpha$ -OH  | $\alpha$ -OH   | $\beta$ -OH    | $\beta$ -H     |
| 265. $\alpha$ -OAc | $\alpha$ -H    | $\beta$ -OH    | $\beta$ -H     |
| 266. $\alpha$ -OAc | $\alpha$ -H    | $\beta$ -OAc   | $\beta$ -H     |

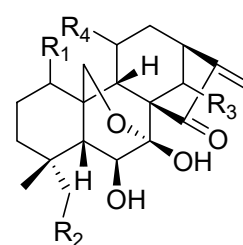

| R <sub>1</sub>     | R <sub>2</sub> | R <sub>3</sub> | R <sub>4</sub> |
|--------------------|----------------|----------------|----------------|
| 274. $\alpha$ -OH  | OAc            | $\beta$ -H     | $\alpha$ -H    |
| 275. $\alpha$ -H   | OAc            | $\beta$ -OH    | $\alpha$ -H    |
| 276. $\alpha$ -H   | OAc            | $\beta$ -H     | $\alpha$ -OH   |
| 277. $\alpha$ -OAc | OAc            | $\beta$ -H     | $\alpha$ -H    |
| 279. $\alpha$ -OAc | H              | $\beta$ -OH    | $\alpha$ -H    |
| 280. $\alpha$ -OH  | H              | $\beta$ -OH    | $\alpha$ -H    |

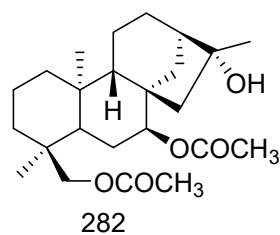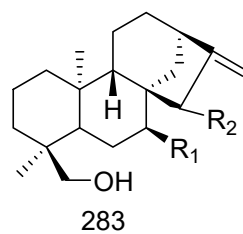

| R <sub>1</sub> | R <sub>2</sub> |
|----------------|----------------|
| 283. OAc       | $\beta$ -OH    |
| 284. OAc       | $\alpha$ -OH   |
| 285. OH        | $\beta$ -OH    |
| 287. OH        | H              |

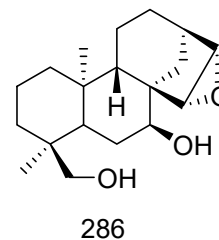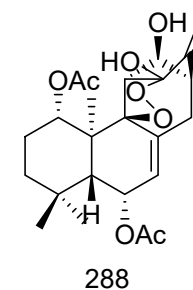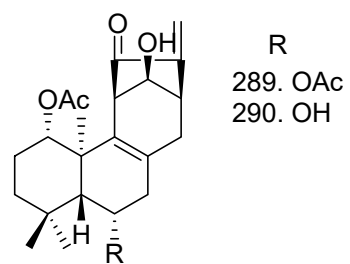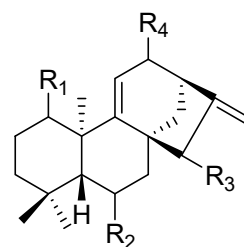

| R <sub>1</sub>     | R <sub>2</sub> | R <sub>3</sub> | R <sub>4</sub> |
|--------------------|----------------|----------------|----------------|
| 291. $\alpha$ -OAc | $\alpha$ -OAc  | =O             | =O             |
| 293. $\alpha$ -OAc | $\alpha$ -OAc  | =O             | $\beta$ -OH    |
| 294. $\alpha$ -OH  | $\alpha$ -OAc  | =O             | $\beta$ -OH    |
| 297. H             | $\alpha$ -OAc  | $\beta$ -OAc   | =O             |

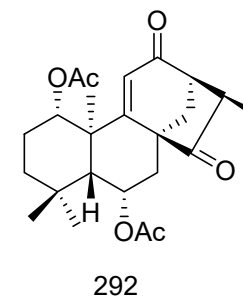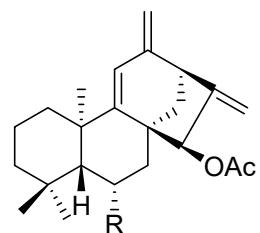

| R        |
|----------|
| 295. OH  |
| 296. OAc |

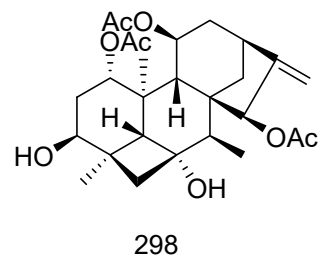

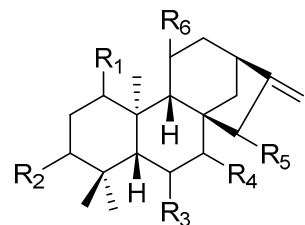

| R <sub>1</sub>     | R <sub>2</sub> | R <sub>3</sub> | R <sub>4</sub> | R <sub>5</sub> | R <sub>6</sub> |
|--------------------|----------------|----------------|----------------|----------------|----------------|
| 299. $\alpha$ -OH  | $\beta$ -OH    | $\alpha$ -OAc  | $\beta$ -OAc   | =O             | $\beta$ -OAc   |
| 300. $\alpha$ -OH  | $\beta$ -OH    | =O             | $\beta$ -OAc   | $\beta$ -OAc   | $\beta$ -OAc   |
| 301. $\alpha$ -OAc | $\beta$ -OH    | $\alpha$ -OH   | $\beta$ -OAc   | $\beta$ -OAc   | $\beta$ -OAc   |
| 302. $\alpha$ -OAc | $\beta$ -OH    | =O             | $\beta$ -OH    | $\beta$ -OH    | $\beta$ -OAc   |
| 303. $\alpha$ -OAc | $\beta$ -OH    | $\alpha$ -OH   | $\beta$ -OAc   | $\beta$ -OH    | $\beta$ -OH    |
| 304. $\alpha$ -OAc | $\beta$ -OH    | $\alpha$ -OAc  | $\beta$ -OAc   | $\beta$ -OH    | $\beta$ -OH    |
| 305. $\alpha$ -OH  | $\beta$ -OH    | H              | $\beta$ -OAc   | $\beta$ -OH    | $\beta$ -OAc   |
| 306. $\alpha$ -OH  | $\beta$ -OH    | $\alpha$ -OH   | $\beta$ -OAc   | $\beta$ -OH    | $\beta$ -OAc   |
| 307. $\alpha$ -OH  | $\beta$ -OH    | =O             | $\beta$ -H     | $\beta$ -OAc   | $\beta$ -OH    |
| 308. $\alpha$ -OAc | $\beta$ -OH    | $\alpha$ -OH   | $\beta$ -OAc   | =O             | $\beta$ -OAc   |
| 309. $\alpha$ -OAc | $\beta$ -OH    | =O             | $\beta$ -OAc   | $\beta$ -OAc   | $\beta$ -OAc   |
| 310. $\alpha$ -OAc | $\beta$ -OH    | =O             | $\beta$ -OH    | $\beta$ -OAc   | $\beta$ -OAc   |
| 311. $\alpha$ -OH  | $\beta$ -OAc   | $\alpha$ -OH   | $\beta$ -OAc   | $\beta$ -OH    | $\beta$ -OH    |
| 312. $\alpha$ -OH  | $\beta$ -OAc   | H              | $\beta$ -OAc   | $\beta$ -OH    | $\beta$ -OH    |
| 313. $\alpha$ -OAc | $\beta$ -OH    | $\alpha$ -OH   | $\beta$ -OAc   | =O             | $\beta$ -OAc   |
| 314. $\alpha$ -OAc | $\beta$ -OH    | =O             | $\beta$ -OAc   | =O             | $\beta$ -OAc   |
| 315. $\alpha$ -OAc | $\beta$ -OH    | $\beta$ -OH    | $\beta$ -OAc   | $\beta$ -OH    | $\beta$ -OAc   |
| 316. $\alpha$ -OAc | $\beta$ -OH    | =O             | $\beta$ -OAc   | $\beta$ -OH    | $\beta$ -OAc   |
| 317. $\alpha$ -OH  | $\beta$ -OH    | =O             | $\beta$ -OAc   | =O             | $\beta$ -OAc   |

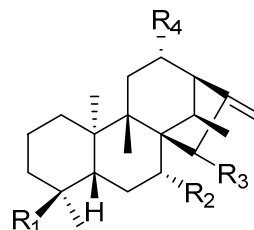

| R <sub>1</sub> | R <sub>2</sub> | R <sub>3</sub> | R <sub>4</sub> |
|----------------|----------------|----------------|----------------|
| 318. MeOH      | $\alpha$ -OH   | $\beta$ -OAc   | $\alpha$ -OH   |
| 319. CHO       | $\alpha$ -OH   | $\beta$ -OAc   | $\alpha$ -OH   |
| 320. MeOH      | $\alpha$ -OH   | $\beta$ -OAc   | $\alpha$ -H    |
| 323. MeOH      | $\alpha$ -OH   | $\beta$ -H     | $\alpha$ -OH   |
| 324. CHO       | $\alpha$ -OH   | =O             | $\alpha$ -H    |
| 325. COOH      | $\alpha$ -OH   | =O             | $\alpha$ -H    |
| 327. AcOHC     | $\alpha$ -OH   | =O             | $\alpha$ -OH   |
| 328. CHO       | $\alpha$ -OH   | =O             | $\alpha$ -OH   |
| 329. MeOH      | $\alpha$ -OH   | =O             | $\alpha$ -OH   |
| 330. MeOH      | $\alpha$ -OH   | =O             | $\alpha$ -H    |
| 331. COOH      | $\alpha$ -OH   | =O             | $\alpha$ -OH   |

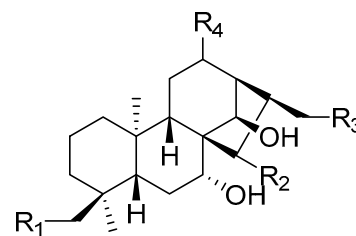

| R <sub>1</sub> | R <sub>2</sub> | R <sub>3</sub> | R <sub>4</sub> |
|----------------|----------------|----------------|----------------|
| 321. OH        | $\beta$ -OH    | H              | =O             |
| 322. OAc       | =O             | OH             | $\alpha$ -OH   |
| 326. Glc       | =O             | OH             | $\alpha$ -OH   |
| 332. H         | =O             | H              | $\alpha$ -OH   |

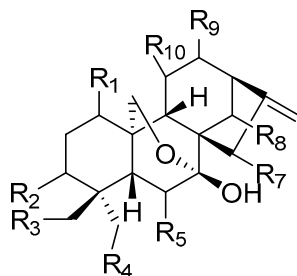

| R <sub>1</sub>     | R <sub>2</sub> | R <sub>3</sub> | R <sub>4</sub> | R <sub>5</sub> | R <sub>6</sub> | R <sub>7</sub> | R <sub>8</sub> |
|--------------------|----------------|----------------|----------------|----------------|----------------|----------------|----------------|
| 334. $\alpha$ -H   | H              | H              | OAc            | $\beta$ -OH    | $\beta$ -OH    | $\beta$ -H     | H              |
| 335. $\alpha$ -H   | H              | OH             | H              | $\beta$ -H     | $\beta$ -OH    | $\beta$ -OH    | H              |
| 350. $\alpha$ -OH  | H              | H              | H              | $\beta$ -OH    | =O             | $\beta$ -OH    | H              |
| 351. $\alpha$ -OH  | H              | H              | H              | $\beta$ -OH    | $\beta$ -OH    | $\beta$ -H     | H              |
| 406. $\alpha$ -H   | $\alpha$ -OH   | H              | H              | $\beta$ -OH    | =O             | $\beta$ -OH    | $\beta$ -H     |
| 407. $\alpha$ -H   | $\alpha$ -H    | H              | H              | $\beta$ -OH    | =O             | $\beta$ -OH    | $\beta$ -OH    |
| 408. $\alpha$ -H   | $\alpha$ -H    | H              | H              | $\beta$ -OAc   | $\beta$ -OAc   | $\beta$ -OH    | $\beta$ -H     |
| 409. $\alpha$ -H   | $\alpha$ -H    | H              | H              | $\beta$ -OH    | $\beta$ -OH    | $\beta$ -OH    | $\beta$ -H     |
| 410. $\alpha$ -OH  | $\alpha$ -H    | H              | H              | $\beta$ -OH    | $\beta$ -OH    | $\beta$ -OH    | $\beta$ -H     |
| 411. $\alpha$ -H   | $\alpha$ -H    | H              | H              | $\beta$ -OH    | $\beta$ -OH    | $\beta$ -OH    | $\beta$ -H     |
| 412. $\alpha$ -H   | $\alpha$ -H    | H              | H              | $\beta$ -OH    | =O             | $\alpha$ -OH   | $\beta$ -H     |
| 418. H             | $\alpha$ -OH   | H              | H              | $\beta$ -OH    | =O             | H              | H              |
| 483. $\alpha$ -OAc | H              | H              | H              | $\beta$ -OH    | $\beta$ -OH    | $\beta$ -OH    | H              |
| 484. $\alpha$ -OH  | H              | H              | H              | $\beta$ -OH    | $\beta$ -OH    | $\beta$ -OH    | H              |

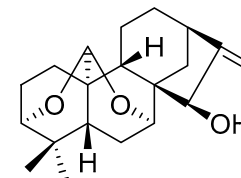

333

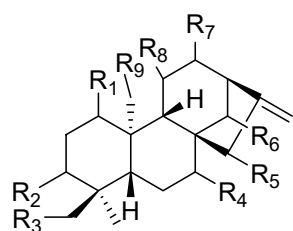

|      | R <sub>1</sub> | R <sub>2</sub> | R <sub>3</sub> | R <sub>4</sub> | R <sub>5</sub> | R <sub>6</sub> | R <sub>7</sub> | R <sub>8</sub> | R <sub>9</sub> |
|------|----------------|----------------|----------------|----------------|----------------|----------------|----------------|----------------|----------------|
| 339. | H              | H              | H              | $\alpha$ -OH   | =O             | $\beta$ -OH    | $\alpha$ -OH   | $\beta$ -OH    | OAc            |
| 340. | H              | H              | OH             | $\alpha$ -OH   | =O             | $\beta$ -OH    | $\alpha$ -H    | $\beta$ -H     | OAc            |
| 341. | H              | H              | OH             | $\alpha$ -OH   | =O             | $\beta$ -OH    | $\alpha$ -H    | $\beta$ -OH    | OAc            |
| 342. | H              | H              | H              | $\alpha$ -OH   | =O             | $\beta$ -OH    | $\alpha$ -OH   | $\beta$ -OH    | OH             |
| 346. | H              | H              | H              | $\alpha$ -OH   | =O             | $\beta$ -OH    | $\alpha$ -H    | $\beta$ -OH    | OAc            |
| 347. | H              | H              | H              | $\alpha$ -OH   | =O             | $\beta$ -OH    | $\alpha$ -H    | $\beta$ -OH    | OH             |
| 348. | H              | H              | H              | $\alpha$ -OH   | =O             | $\beta$ -OH    | $\alpha$ -H    | $\beta$ -OH    | H              |
| 349. | H              | H              | H              | $\alpha$ -OH   | =O             | $\beta$ -OH    | $\alpha$ -OH   | $\beta$ -OH    | H              |
| 357. | H              | $\beta$ -OH    | H              | $\alpha$ -OH   | =O             | $\beta$ -OH    | $\alpha$ -OH   | H              | H              |
| 358. | H              | $\alpha$ -OH   | H              | $\alpha$ -OH   | =O             | $\beta$ -OH    | $\alpha$ -OAc  | H              | H              |
| 359. | H              | $\beta$ -OAc   | H              | $\alpha$ -OAc  | =O             | $\beta$ -OH    | =O             | H              | H              |
| 360. | H              | $\beta$ -OH    | H              | $\alpha$ -OH   | $\beta$ -OH    | $\beta$ -OH    | =O             | H              | H              |
| 361. | H              | $\beta$ -OH    | H              | $\alpha$ -H    | $\beta$ -OH    | $\beta$ -OAc   | $\alpha$ -OH   | H              | H              |
| 362. | H              | $\alpha$ -OH   | H              | $\alpha$ -OH   | $\beta$ -OH    | $\beta$ -OH    | =O             | H              | H              |
| 363. | $\alpha$ -OH   | $\alpha$ -OAc  | H              | $\alpha$ -OH   | =O             | $\beta$ -OH    | $\alpha$ -OH   | H              | H              |
| 364. | $\alpha$ -OH   | $\alpha$ -OAc  | H              | $\alpha$ -OH   | $\beta$ -OAc   | $\beta$ -OH    | =O             | H              | H              |
| 370. | H              | $\alpha$ -OH   | H              | $\alpha$ -OH   | =O             | $\beta$ -OH    | $\alpha$ -H    | H              | H              |
| 371. | H              | $\alpha$ -OH   | H              | $\alpha$ -OH   | =O             | $\beta$ -OH    | $\alpha$ -OH   | H              | H              |
| 372. | H              | $\beta$ -OAc   | H              | $\alpha$ -OH   | =O             | $\beta$ -OH    | =O             | H              | H              |
| 373. | $\alpha$ -OH   | $\beta$ -OAc   | H              | $\alpha$ -OH   | =O             | $\beta$ -OH    | =O             | H              | H              |
| 374. | H              | =O             | H              | $\alpha$ -OH   | =O             | $\beta$ -OH    | $\alpha$ -H    | H              | H              |
| 375. | H              | =O             | H              | $\alpha$ -OH   | =O             | $\beta$ -OAc   | $\alpha$ -H    | H              | H              |
| 376. | $\alpha$ -OH   | $\beta$ -OAc   | H              | $\alpha$ -OH   | =O             | $\beta$ -OH    | $\alpha$ -H    | H              | H              |
| 377. | $\alpha$ -OH   | $\beta$ -OH    | H              | $\alpha$ -OH   | =O             | $\beta$ -OH    | $\alpha$ -H    | H              | H              |
| 378. | $\alpha$ -OH   | H              | H              | $\alpha$ -OH   | =O             | $\beta$ -OH    | $\alpha$ -H    | H              | H              |
| 379. | H              | $\beta$ -OH    | H              | $\alpha$ -OH   | =O             | $\beta$ -OH    | $\alpha$ -H    | H              | H              |
| 380. | H              | $\beta$ -OAc   | H              | $\alpha$ -OH   | =O             | $\beta$ -OAc   | $\alpha$ -H    | H              | H              |
| 381. | $\alpha$ -OH   | $\beta$ -OAc   | H              | $\alpha$ -OH   | =O             | $\beta$ -OH    | =O             | H              | H              |

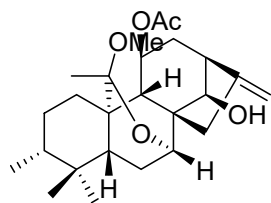

345

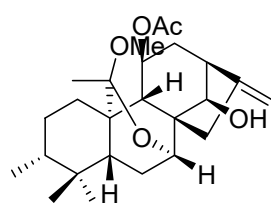

336

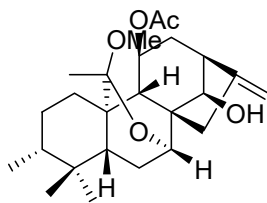

337

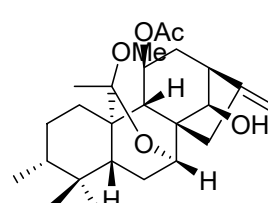

338

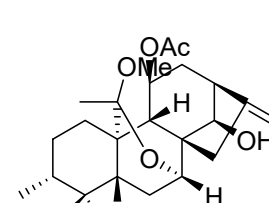

343

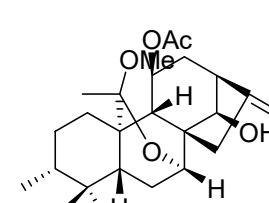

344

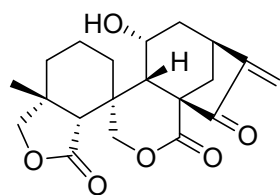

352

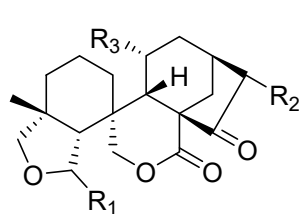

| R1                | R2           | R3          |
|-------------------|--------------|-------------|
| 353. OMe          | $\alpha$ -Me | $\alpha$ -H |
| 354. $\alpha$ -OH | $\beta$ -Me  | $\alpha$ -H |
| 355. $\alpha$ -OH | $\beta$ -Me  | $\alpha$ -H |

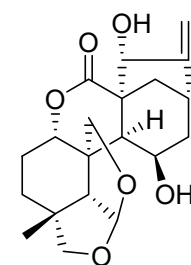

356

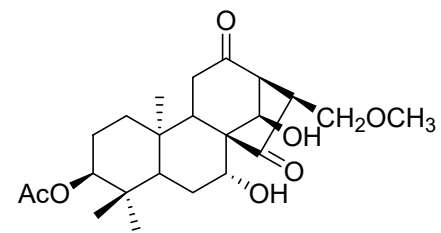

365

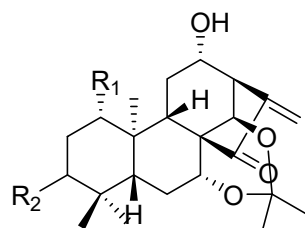

| R1      | R2           |
|---------|--------------|
| 366. H  | $\alpha$ -OH |
| 367. H  | $\beta$ -OH  |
| 368. OH | $\beta$ -OAc |
| 369. OH | $\alpha$ -OH |

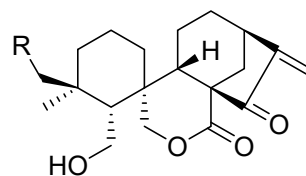

| R       |
|---------|
| 382. H  |
| 389. OH |

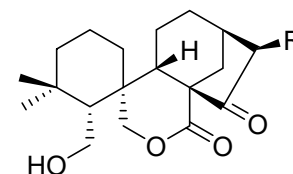

| R                                 |
|-----------------------------------|
| 383. $\beta$ -MeOCH <sub>2</sub>  |
| 384. $\alpha$ -MeOCH <sub>2</sub> |

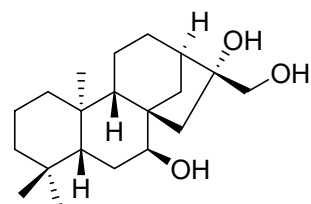

389

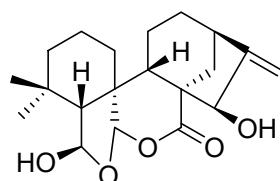

390

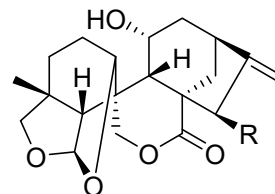

| R                |
|------------------|
| 385. $\beta$ -OH |
| 388. =O          |

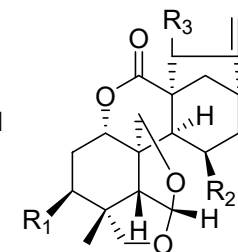

| R1      | R2 | R3           |
|---------|----|--------------|
| 387. OH | OH | =O           |
| 396. H  | H  | =O           |
| 397. H  | OH | =O           |
| 398. H  | OH | $\alpha$ -OH |

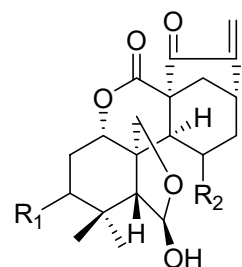

| R1                | R2           |
|-------------------|--------------|
| 386. $\alpha$ -OH | $\beta$ -OH  |
| 391. H            | $\alpha$ -OH |
| 392. $\beta$ -OH  | H            |
| 393. H            | H            |
| 394. H            | $\beta$ -OH  |
| 395. $\beta$ -OH  | $\beta$ -OH  |

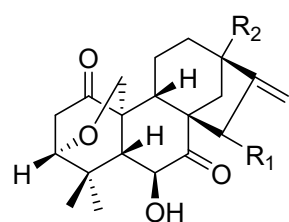

| R <sub>1</sub> | R <sub>2</sub> |
|----------------|----------------|
| 400. =O        | H              |
| 402. OH        | α-H            |
| 403. OAc       | α-OH           |
| 404. OAc       | α-H            |
| 421. β-OH      | α-OH           |
| 425. β-OAc     | α-OH           |
| 427. β-OAc     | H              |
| 428. β-OH      | H              |

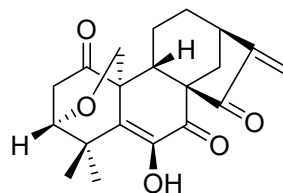

405

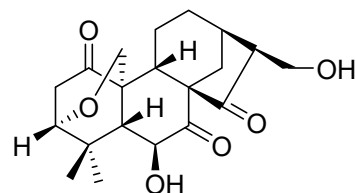

401

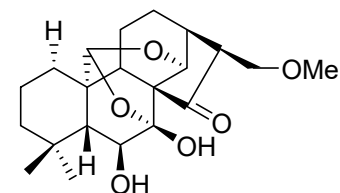

413

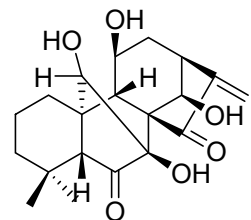

419

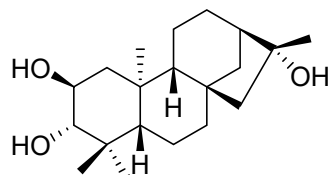

420

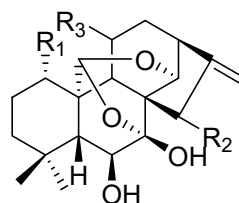

| R <sub>1</sub> | R <sub>2</sub> | R <sub>3</sub> |
|----------------|----------------|----------------|
| 414. H         | α-OH           | α-OH           |
| 415. H         | =O             | H              |
| 416. OH        | =O             | H              |
| 417. H         | =O             | β-OH           |
| 441. OH        | β-OH           | β-H            |
| 442. OH        | β-OH           | H              |
| 443. OH        | α-OH           | H              |
| 444. OH        | =O             | H              |
| 445. OH        | =O             | β-H            |
| 446. H         | =O             | β-OH           |
| 447. H         | β-OH           | β-H            |

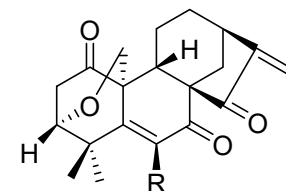

422

| R        |
|----------|
| 422. OH  |
| 429. OAc |

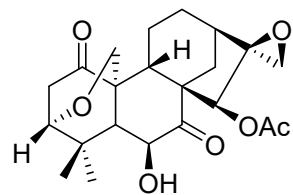

426

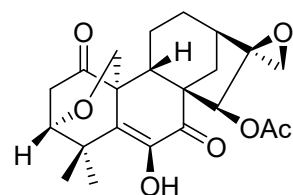

423

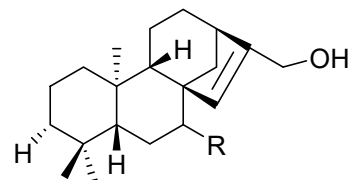

| R       |
|---------|
| 424. =O |
| 430. H  |

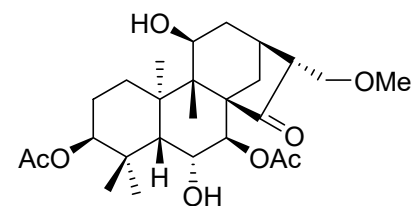

435

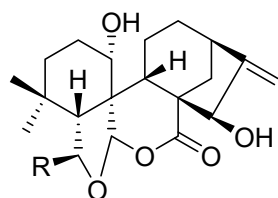

| R        |
|----------|
| 448. OMe |
| 449. OH  |

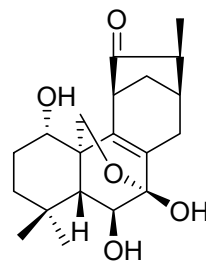

450

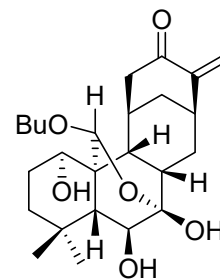

451

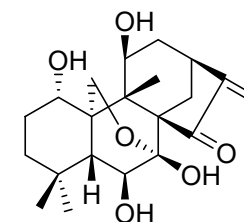

452

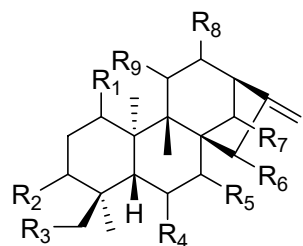

|      | R1           | R2           | R3 | R4            | R5            | R6          | R7          | R8           | R9          |
|------|--------------|--------------|----|---------------|---------------|-------------|-------------|--------------|-------------|
| 431. | H            | $\beta$ -OH  | H  | $\alpha$ -OAc | OAc           | =O          | H           | H            | $\beta$ -OH |
| 432. | H            | $\beta$ -OAc | H  | $\alpha$ -OAc | OAc           | $\beta$ -OH | H           | H            | $\beta$ -OH |
| 433. | H            | $\beta$ -OAc | H  | $\alpha$ -OH  | OAc           | $\beta$ -OH | H           | H            | $\beta$ -OH |
| 434. | H            | $\beta$ -OAc | H  | $\alpha$ -OH  | OH            | =O          | H           | H            | $\beta$ -OH |
| 436. | H            | $\beta$ -OAc | H  | =O            | OAc           | =O          | H           | H            | $\beta$ -OH |
| 437. | H            | $\beta$ -OH  | H  | $\alpha$ -OAc | OH            | =O          | H           | H            | $\beta$ -OH |
| 438. | H            | $\beta$ -OAc | H  | $\alpha$ -OAc | OH            | =O          | H           | H            | $\beta$ -OH |
| 439. | H            | $\beta$ -OAc | H  | $\alpha$ -OAc | OAc           | =O          | H           | H            | $\beta$ -OH |
| 440. | H            | $\beta$ -OAc | H  | $\alpha$ -OH  | OAc           | =O          | H           | H            | $\beta$ -OH |
| 453. | H            | b-OAc        | H  | H             | $\alpha$ -OH  | $\beta$ -OH | $\beta$ -OH | H            | H           |
| 454. | H            | b-OH         | H  | H             | $\alpha$ -OH  | $\beta$ -OH | $\beta$ -OH | H            | H           |
| 455. | H            | $\alpha$ -OH | H  | H             | $\alpha$ -OH  | $\beta$ -OH | $\beta$ -OH | H            | H           |
| 457. | $\alpha$ -H  | $\beta$ -OAc | H  | H             | $\alpha$ -OH  | =O          | $\beta$ -OH | a-OH         | H           |
| 458. | $\alpha$ -H  | $\beta$ -OH  | H  | H             | $\alpha$ -OH  | =O          | $\beta$ -OH | $\alpha$ -H  | H           |
| 459. | $\alpha$ -OH | $\beta$ -OH  | H  | H             | $\alpha$ -OH  | =O          | $\beta$ -OH | $\alpha$ -H  | H           |
| 460. | $\alpha$ -H  | =O           | H  | H             | $\alpha$ -OH  | =O          | $\beta$ -OH | $\alpha$ -H  | H           |
| 461. | $\alpha$ -H  | =O           | OH | H             | $\alpha$ -OH  | =O          | $\beta$ -OH | $\alpha$ -H  | H           |
| 462. | $\alpha$ -H  | $\beta$ -OAc | H  | H             | $\alpha$ -OH  | =O          | $\beta$ -OH | $\alpha$ -H  | H           |
| 463. | $\alpha$ -H  | $\beta$ -OH  | H  | H             | $\alpha$ -OH  | =O          | $\beta$ -OH | $\alpha$ -H  | H           |
| 464. | $\alpha$ -H  | $\alpha$ -OH | H  | H             | $\alpha$ -OH  | =O          | $\beta$ -OH | $\alpha$ -H  | H           |
| 465. | $\alpha$ -H  | $\beta$ -OAc | H  | H             | $\alpha$ -OAc | =O          | $\beta$ -OH | $\alpha$ -H  | H           |
| 486. | H            | H            | OH | H             | H             | $\beta$ -OH | $\beta$ -OH | H            | $\beta$ -OH |
| 497. | H            | H            | H  | H             | $\alpha$ -OAc | =O          | $\beta$ -OH | $\alpha$ -OH | $\beta$ -OH |

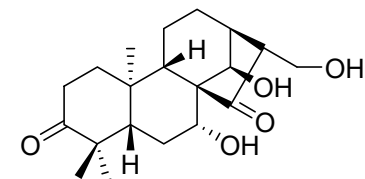

456

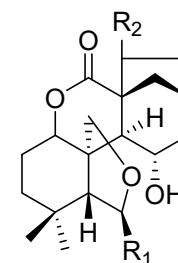

| R1       | R2   |
|----------|------|
| 466. OMe | a-OH |
| 470. OMe | =O   |
| 471. OH  | =O   |

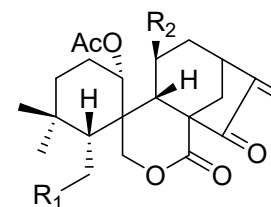

| R1       | R2  |
|----------|-----|
| 472. OH  | OH  |
| 473. OH  | H   |
| 474. OAc | OH  |
| 475. OAc | OAc |

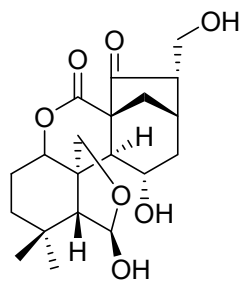

469

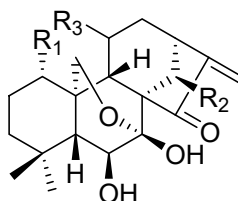

| R1       | R2 | R3    |
|----------|----|-------|
| 476. OAc | OH | H     |
| 477. OH  | H  | b-OH  |
| 478. OH  | OH | H     |
| 479. OH  | H  | H     |
| 480. OAc | H  | a-OAc |
| 481. H   | OH | b-OH  |

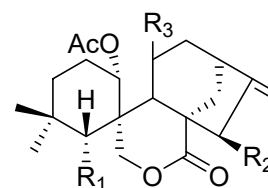

| R1         | R2  | R3   |
|------------|-----|------|
| 467. MeOH  | OH  | b-OH |
| 468. MeOAc | OAc | b-OH |
| 482. CHO   | =O  | a-OH |

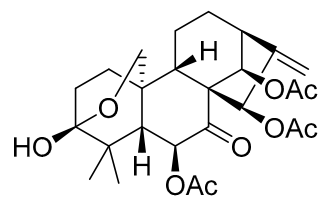

487

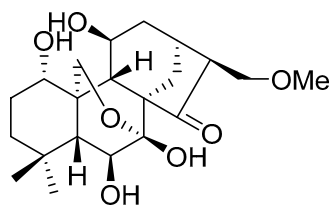

485

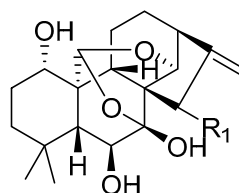

R  
488. b-OAc  
489. =O

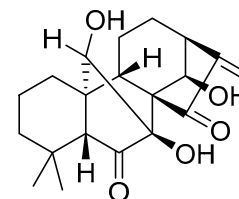

490

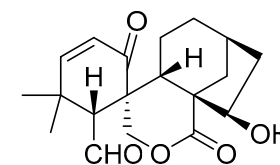

491

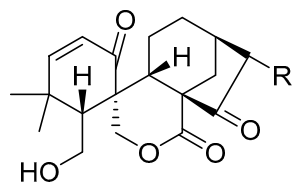

R  
492.  $\alpha$ -Me  
493.  $\beta$ -Me

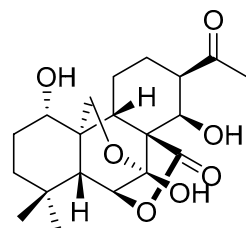

494

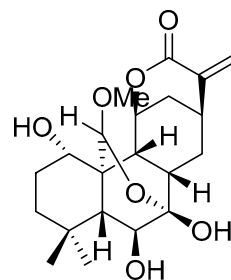

495

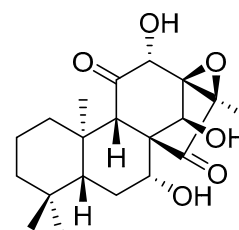

496

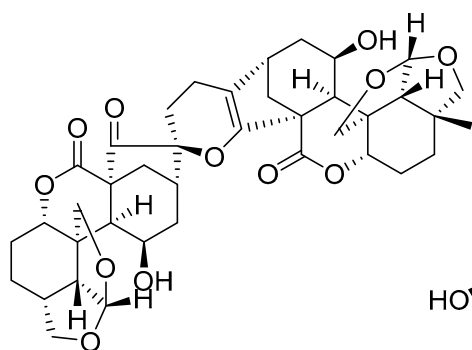

500

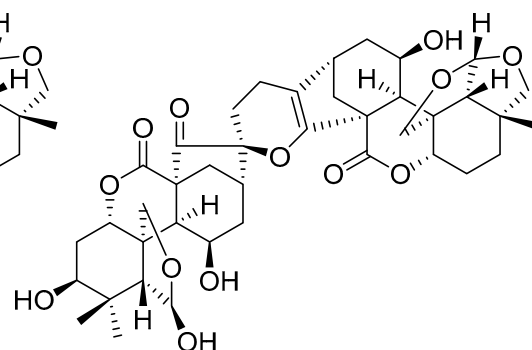

501

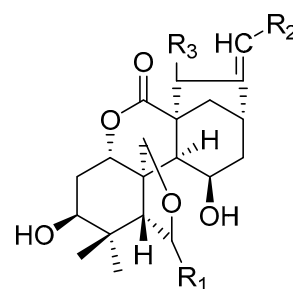

R<sub>1</sub>  
503. b-OH  
504. H  
505. H

R<sub>2</sub>  
H  
H  
OH

R<sub>3</sub>  
a-OH  
=O  
=O



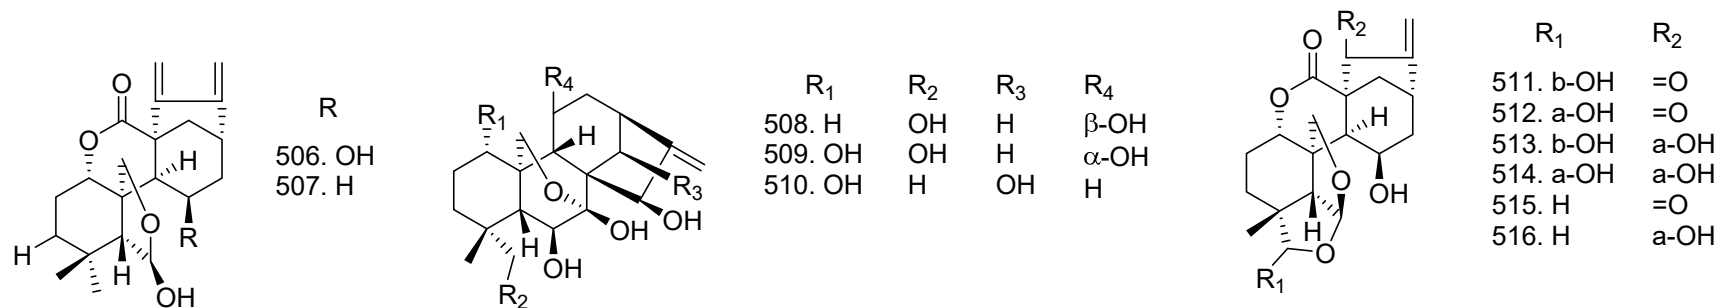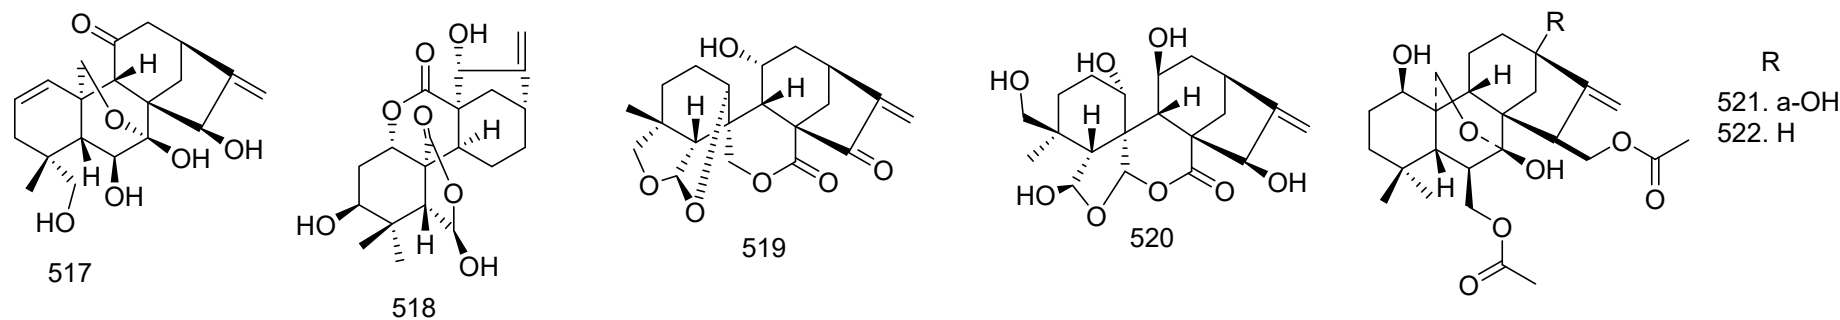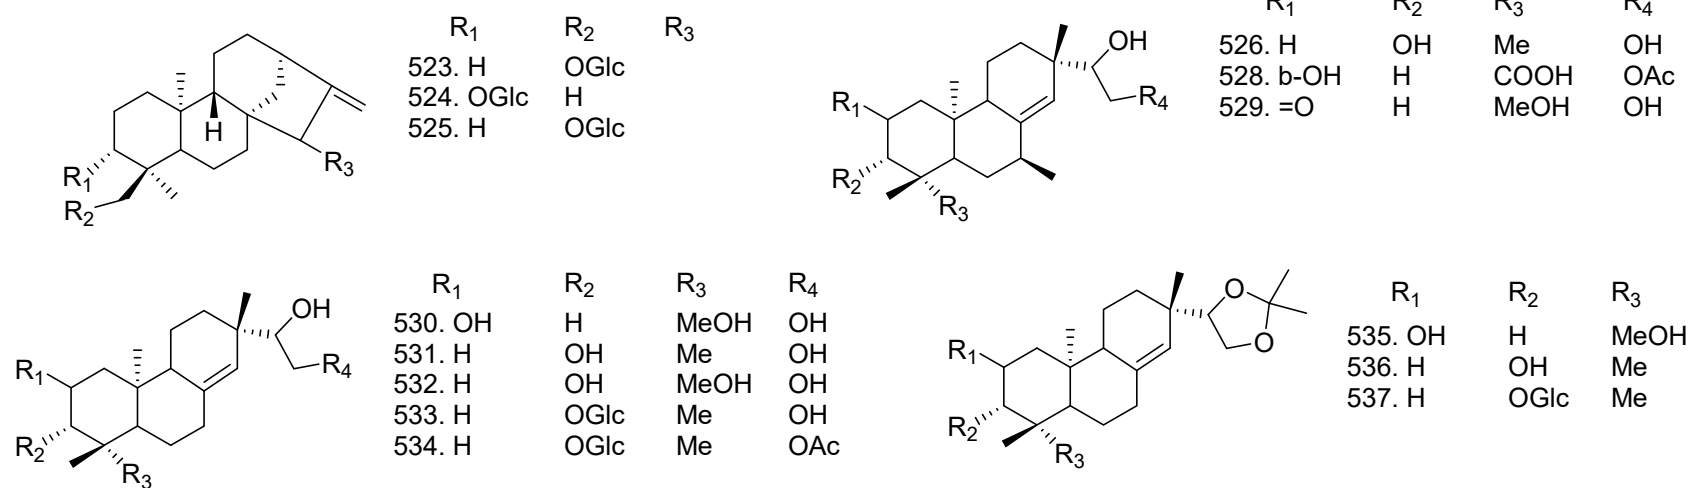

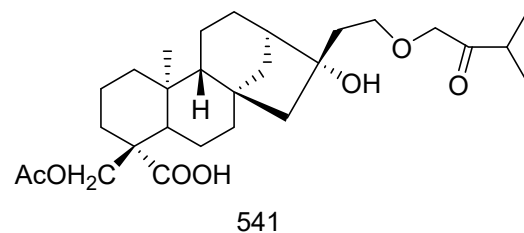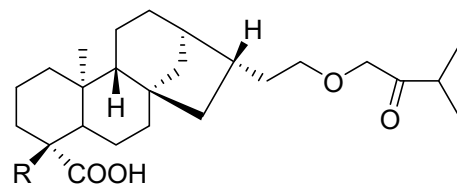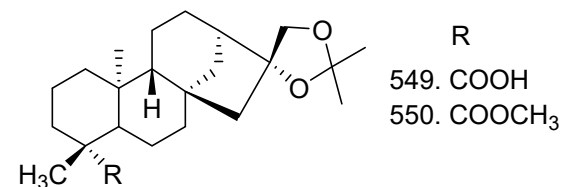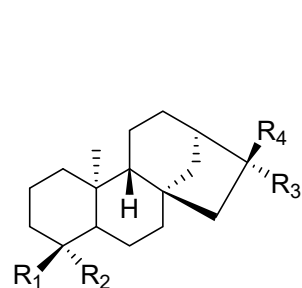

| R <sub>1</sub> | R <sub>2</sub>     | R <sub>3</sub> | R <sub>4</sub> |
|----------------|--------------------|----------------|----------------|
| 538. MeOAc     | COOH               | MeOH           | H              |
| 539. MeOAc     | COOH               | OH             | MeOH           |
| 542 MeOH       | COOH               | OH             | MeOH           |
| 543. MeOH      | COOH               | MeOH           | H              |
| 545. Me        | COOH               | OH             | MeOH           |
| 546. Me        | COOH               | H              | MeOH           |
| 547. Me        | COOCH <sub>3</sub> | H              | MeOH           |
| 548. Me        | COOH               | COOH           | H              |
| 557. H         | H                  | OH             | Me             |

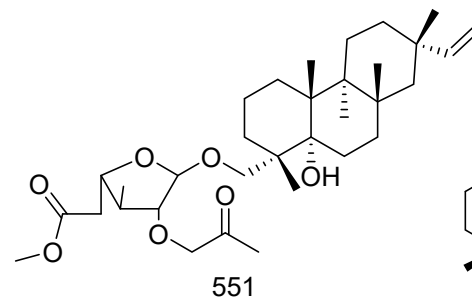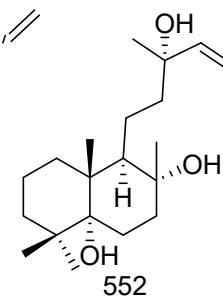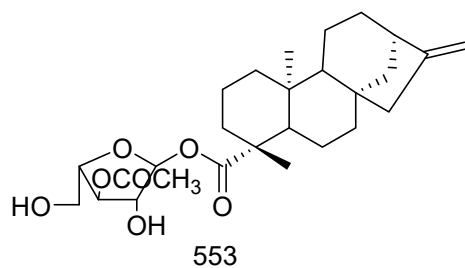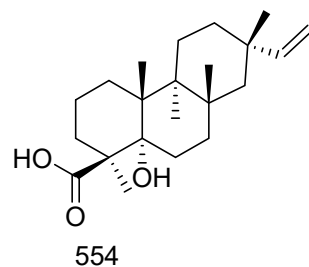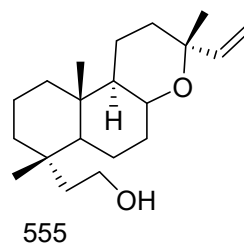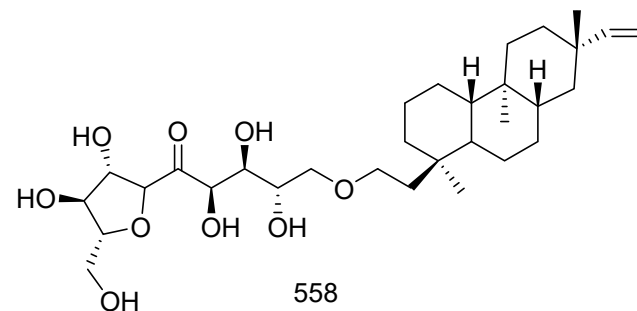

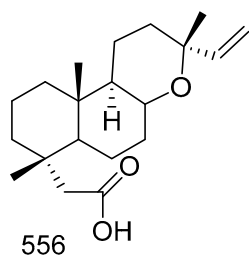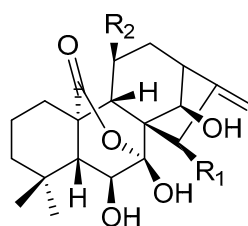

| R <sub>1</sub> | R <sub>2</sub> |
|----------------|----------------|
| 561. OH        | OH             |
| 562. OH        | OAce           |
| 563. OH        | H              |
| 564. =O        | H              |

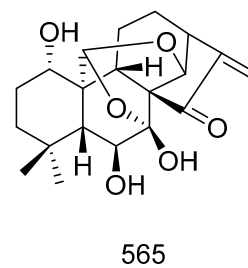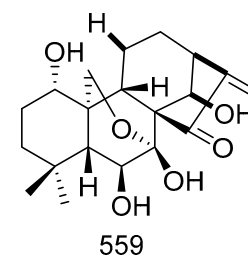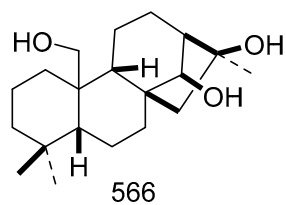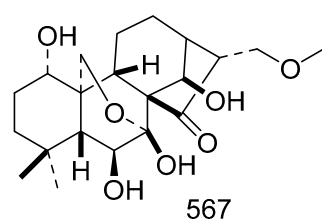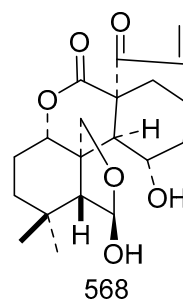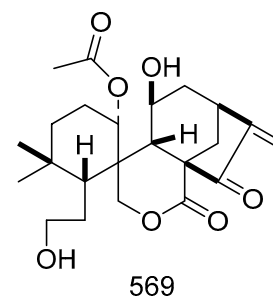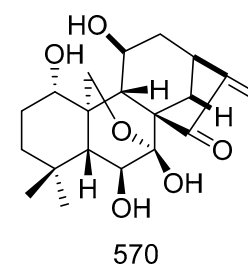

---

**SUPPLEMENTARY INFORMATION S2: Source and bioactivities of *ent*-kaurane diterpenoids**Table S1. A table showing the source and reported bioactivities of various *ent*-kaurane diterpenoids.

| Structure | Source                       | Bioactivity |
|-----------|------------------------------|-------------|
| 1         | <i>Jungermania tetragona</i> | Anticancer  |
| 2         | <i>Jungermania tetragona</i> | Anticancer  |
| 3         | <i>Jungermania tetragona</i> | Anticancer  |
| 4         | <i>Jungermania tetragona</i> | NA          |
| 5         | <i>Jungermania tetragona</i> | Anticancer  |
| 6         | <i>Jungermania tetragona</i> | NA          |
| 7         | <i>Jungermania tetragona</i> | NA          |
| 8         | <i>Jungermania tetragona</i> | NA          |
| 9         | <i>Jungermania tetragona</i> | NA          |
| 10        | <i>Jungermania tetragona</i> | Anticancer  |
| 11        | <i>Jungermania tetragona</i> | NA          |
| 12        | <i>Jungermania tetragona</i> | Anticancer  |
| 13        | <i>Jungermania tetragona</i> | NA          |
| 14        | <i>Jungermania tetragona</i> | NA          |
| 15        | <i>Jungermania tetragona</i> | NA          |
| 16        | <i>Jungermania tetragona</i> | NA          |
| 17        | <i>Jungermania tetragona</i> | NA          |
| 18        | <i>Jungermania tetragona</i> | NA          |
| 19        | <i>Jungermania tetragona</i> | NA          |
| 20        | <i>Jungermania tetragona</i> | NA          |
| 21        | <i>Jungermania tetragona</i> | Anticancer  |
| 22        | <i>Jungermania tetragona</i> | Anticancer  |
| 23        | <i>Jungermania tetragona</i> | Anticancer  |
| 24        | <i>Jungermania tetragona</i> | NA          |
| 25        | <i>Jungermania tetragona</i> | NA          |
| 26        | <i>Jungermania tetragona</i> | NA          |
| 27        | <i>Jungermania tetragona</i> | NA          |
| 28        | <i>Jungermania tetragona</i> | NA          |
| 29        | <i>Jungermania tetragona</i> | NA          |
| 30        | <i>Jungermania tetragona</i> | NA          |
| 31        | <i>Jungermani. Sp</i>        | Anticancer  |
| 32        | <i>Jungermani. Sp</i>        | Anticancer  |
| 33        | <i>Jungermani. Sp</i>        | Anticancer  |
| 34        | <i>Jungermani. Sp</i>        | Anticancer  |
| 35        | <i>Jungermani. Sp</i>        | Anticancer  |
| 36        | <i>Jungermani. Sp</i>        | Anticancer  |
| 37        | <i>Jungermani. Sp</i>        | Anticancer  |
| 38        | <i>Jungermani. Sp</i>        | Anticancer  |
| 39        | <i>Jungermani. Sp</i>        | NA          |

---

|    |                                           |                          |
|----|-------------------------------------------|--------------------------|
| 40 | <i>Jungermani. Sp</i>                     | NA                       |
| 41 | <i>Jungermani. Sp</i>                     | NA                       |
| 42 | <i>Jungermani. Sp</i>                     | NA                       |
| 43 | <i>Jungermani. Sp</i>                     | NA                       |
| 44 | <i>Jungermani. Sp</i>                     | NA                       |
| 45 | <i>Jungermani. Sp</i>                     | NA                       |
| 46 | <i>Jungermani. Sp</i>                     | NA                       |
| 47 | <i>Jungermani. Sp</i>                     | NA                       |
| 48 | <i>Jungermani. Sp</i>                     | NA                       |
| 49 | <i>Jungermani. Sp</i>                     | NA                       |
| 50 | <i>Jungermani. Sp</i>                     | NA                       |
| 51 | <i>Jungermani. Sp</i>                     | NA                       |
| 52 | <i>Isodon wikstroemioides</i>             | Anticancer, NO inhibitor |
| 53 | <i>Isodon wikstroemioides</i>             | NA                       |
| 54 | <i>Isodon wikstroemioides</i>             | Anticancer, NO inhibitor |
| 55 | <i>Isodon wikstroemioides</i>             | Anticancer, NO inhibitor |
| 56 | <i>Isodon wikstroemioides</i>             | Anticancer, NO inhibitor |
| 57 | <i>Isodon wikstroemioides</i>             | NA                       |
| 58 | <i>Isodon wikstroemioides</i>             | Anticancer, NO inhibitor |
| 59 | <i>Isodon rubescens</i>                   | NA                       |
| 60 | <i>Isodon rubescens</i>                   | Anticancer               |
| 61 | <i>Isodon rubescens</i>                   | NA                       |
| 62 | <i>Isodon rubescens</i>                   | NT                       |
| 63 | <i>Isodon rubescens</i>                   | NA                       |
| 64 | <i>Isodon rubescens</i>                   | NA                       |
| 65 | <i>Isodon rubescens</i>                   | NA                       |
| 66 | <i>Isodon rubescens</i>                   | NA                       |
| 67 | <i>Isodon rubescens</i>                   | Anticancer               |
| 68 | <i>Isodon rubescens</i>                   | NA                       |
| 69 | <i>Isodon rubescens var. Taihangensis</i> | Anticancer               |
| 70 | <i>Isodon rubescens</i>                   | NA                       |
| 71 | <i>Isodon eryocalyx</i>                   | NT                       |
| 72 | <i>Isodon eryocalyx</i>                   | NT                       |
| 73 | <i>Isodon eryocalyx</i>                   | NT                       |
| 74 | <i>Isodon eryocalyx</i>                   | NT                       |
| 75 | <i>Isodon eryocalyx</i>                   | NT                       |
| 76 | <i>Jungermania. Sp</i>                    | NA                       |
| 77 | <i>Jungermania. Sp</i>                    | NA                       |
| 78 | <i>Jungermania. Sp</i>                    | NA                       |
| 79 | <i>Jungermania. Sp</i>                    | NA                       |
| 80 | <i>Jungermania. Sp</i>                    | NA                       |
| 81 | <i>Jungermania. Sp</i>                    | NA                       |

|     |                                              |                          |
|-----|----------------------------------------------|--------------------------|
| 82  | <i>Jungermania. Sp</i>                       | NA                       |
| 83  | <i>Jungermania. Sp</i>                       | NA                       |
| 84  | <i>Jungermania. Sp</i>                       | NA                       |
| 85  | <i>Jungermania. Sp</i>                       | NA                       |
| 86  | <i>Jungermania. Sp</i>                       | NA                       |
| 87  | <i>Jungermania. Sp</i>                       | NA                       |
| 88  | <i>Jungermania. Sp</i>                       | NA                       |
| 89  | <i>Jungermania. Sp</i>                       | NA                       |
| 90  | <i>Jungermania. Sp</i>                       | Anticancer               |
| 91  | <i>Jungermania. Sp</i>                       | NA                       |
| 92  | <i>Jungermania. Sp</i>                       | NA                       |
| 93  | <i>Jungermania. Sp</i>                       | NA                       |
| 94  | <i>Jungermania. Sp</i>                       | NA                       |
| 95  | <i>Jungermania. Sp</i>                       | NA                       |
| 96  | <i>Jungermania. Sp</i>                       | NA                       |
| 97  | <i>Pteris multifida</i>                      | Anticancer, NO inhibitor |
| 98  | <i>Pteris multifida</i>                      | Anticancer               |
| 99  | <i>Pteris multifida</i>                      | NA                       |
| 100 | <i>Pteris multifida</i>                      | NA                       |
| 101 | <i>Pteris multifida</i>                      | NA                       |
| 102 | <i>Pteris multifida</i>                      | NA                       |
| 103 | <i>Pteris multifida</i>                      | Anticancer, NO inhibitor |
| 104 | <i>Pteris multifida</i>                      | NA                       |
| 105 | <i>Pteris multifida</i>                      | NA                       |
| 106 | <i>Pteris multifida</i>                      | NA                       |
| 107 | <i>Pteris multifida</i>                      | NA                       |
| 108 | <i>Pteris multifida</i>                      | NA                       |
| 109 | <i>Isodon nervosus</i>                       | NA                       |
| 110 | <i>Isodon nervosus</i>                       | Anticancer               |
| 111 | <i>Isodon nervosus</i>                       | Anticancer               |
| 112 | <i>Isodon nervosus</i>                       | NA                       |
| 113 | <i>Isodon nervosus</i>                       | Anticancer               |
| 114 | <i>Isodon nervosus</i>                       | NT                       |
| 115 | <i>Isodon nervosus</i>                       | NT                       |
| 116 | <i>Pteris multifida</i>                      | Anticancer               |
| 117 | <i>Pteris multifida</i>                      | Anticancer               |
| 118 | <i>Isodon angustifolius var. Glabrescens</i> | NT                       |
| 119 | <i>Isodon angustifolius var. Glabrescens</i> | NT                       |
| 120 | <i>Isodon angustifolius var. Glabrescens</i> | NT                       |
| 121 | <i>Isodon parvifolius</i>                    | NT                       |
| 122 | <i>Isodon parvifolius</i>                    | NT                       |
| 123 | <i>Isodon parvifolius</i>                    | NT                       |

|     |                               |                          |
|-----|-------------------------------|--------------------------|
| 124 | <i>Isodon parvifolius</i>     | NT                       |
| 125 | <i>Isodon wikstroemioides</i> | Anticancer, NO inhibitor |
| 126 | <i>Isodon wikstroemioides</i> | Anticancer, NO inhibitor |
| 127 | <i>Isodon wikstroemioides</i> | Anticancer, NO inhibitor |
| 128 | <i>Isodon wikstroemioides</i> | Anticancer, NO inhibitor |
| 129 | <i>Isodon wikstroemioides</i> | Anticancer               |
| 130 | <i>Isodon wikstroemioides</i> | Anticancer               |
| 131 | <i>Isodon wikstroemioides</i> | Anticancer               |
| 132 | <i>Isodon wikstroemioides</i> | Anticancer               |
| 133 | <i>Isodon wikstroemioides</i> | Anticancer, NO inhibitor |
| 134 | <i>Isodon wikstroemioides</i> | NT                       |
| 135 | <i>Isodon wikstroemioides</i> | Anticancer, NO inhibitor |
| 136 | <i>Isodon wikstroemioides</i> | Anticancer, NO inhibitor |
| 137 | <i>Isodon wikstroemioides</i> | Anticancer, NO inhibitor |
| 138 | <i>Isodon wikstroemioides</i> | Anticancer               |
| 139 | <i>Isodon wikstroemioides</i> | NT                       |
| 140 | <i>Isodon wikstroemioides</i> | NA                       |
| 141 | <i>Isodon wikstroemioides</i> | Anticancer, NO inhibitor |
| 142 | <i>Isodon wikstroemioides</i> | Anticancer, NO inhibitor |
| 143 | <i>Isodon wikstroemioides</i> | Anticancer               |
| 144 | <i>Isodon wikstroemioides</i> | Anticancer               |
| 145 | <i>Isodon wikstroemioides</i> | Anticancer               |
| 146 | <i>Isodon wikstroemioides</i> | Anticancer               |
| 147 | <i>Isodon wikstroemioides</i> | Anticancer, NO inhibitor |
| 148 | <i>Isodon wikstroemioides</i> | Anticancer, NO inhibitor |
| 149 | <i>Isodon wikstroemioides</i> | Anticancer, NO inhibitor |
| 150 | <i>Isodon wikstroemioides</i> | Anticancer, NO inhibitor |
| 151 | <i>Isodon wikstroemioides</i> | Anticancer, NO inhibitor |
| 152 | <i>Isodon wikstroemioides</i> | Anticancer, NO inhibitor |
| 153 | <i>Isodon wikstroemioides</i> | Anticancer, NO inhibitor |
| 154 | <i>Isodon wikstroemioides</i> | Anticancer, NO inhibitor |
| 155 | <i>Isodon wikstroemioides</i> | Anticancer               |
| 156 | <i>Isodon wikstroemioides</i> | Anticancer, NO inhibitor |
| 157 | <i>Isodon wikstroemioides</i> | Anticancer, NO inhibitor |
| 158 | <i>Isodon wikstroemioides</i> | Anticancer               |
| 159 | <i>Isodon wikstroemioides</i> | Anticancer               |
| 160 | <i>Isodon excisoides</i>      | Anticancer               |
| 161 | <i>Isodon excisoides</i>      | Anticancer               |
| 162 | <i>Isodon excisoides</i>      | Anticancer               |
| 163 | <i>Isodon excisoides</i>      | Anticancer               |
| 164 | <i>Isodon excisoides</i>      | Anticancer               |
| 165 | <i>Isodon excisoides</i>      | Anticancer               |

|     |                           |                          |
|-----|---------------------------|--------------------------|
| 166 | <i>Isodon excisoides</i>  | Anticancer               |
| 167 | <i>Isodon excisoides</i>  | Anticancer               |
| 168 | <i>Isodon excisoides</i>  | Anticancer               |
| 169 | <i>Isodon henryi</i>      | Anticancer               |
| 170 | <i>Isodon henryi</i>      | Anticancer               |
| 171 | <i>Isodon henryi</i>      | Anticancer               |
| 172 | <i>Isodon henryi</i>      | Anticancer               |
| 173 | <i>Isodon henryi</i>      | Anticancer               |
| 174 | <i>Isodon henryi</i>      | Anticancer               |
| 175 | <i>Isodon henryi</i>      | Anticancer               |
| 176 | <i>Isodon rosthornii</i>  | NA                       |
| 177 | <i>Isodon rosthornii</i>  | NA                       |
| 178 | <i>Isodon rosthornii</i>  | NA                       |
| 179 | <i>Isodon rosthornii</i>  | Anticancer               |
| 180 | <i>Isodon rosthornii</i>  | NT                       |
| 181 | <i>Isodon rosthornii</i>  | Anticancer               |
| 182 | <i>Isodon rosthornii</i>  | Anticancer               |
| 183 | <i>Isodon rosthornii</i>  | Anticancer               |
| 184 | <i>Isodon rosthornii</i>  | Anticancer               |
| 185 | <i>Isodon rosthornii</i>  | Anticancer               |
| 186 | <i>Isodon rosthornii</i>  | Anticancer               |
| 187 | <i>Isodon rosthornii</i>  | Anticancer, NO inhibitor |
| 188 | <i>Isodon rosthornii</i>  | Anticancer               |
| 189 | <i>Isodon rosthornii</i>  | NT                       |
| 190 | <i>Isodon rosthornii</i>  | Anticancer, NO inhibitor |
| 191 | <i>Isodon rosthornii</i>  | NT                       |
| 192 | <i>Isodon rosthornii</i>  | Anticancer, NO inhibitor |
| 193 | <i>Isodon rosthornii</i>  | Anticancer, NO inhibitor |
| 194 | <i>Isodon rosthornii</i>  | Anticancer, NO inhibitor |
| 195 | <i>Isodon rosthornii</i>  | Anticancer, NO inhibitor |
| 196 | <i>Isodon rosthornii</i>  | Anticancer, NO inhibitor |
| 197 | <i>Isodon rosthornii</i>  | Anticancer, NO inhibitor |
| 198 | <i>Isodon rosthornii</i>  | Anticancer               |
| 199 | <i>Isodon rosthornii</i>  | Anticancer, NO inhibitor |
| 200 | <i>Isodon rosthornii</i>  | Anticancer               |
| 201 | <i>Isodon rosthornii</i>  | Anticancer, NO inhibitor |
| 202 | <i>Isodon tenuifolius</i> | Anticancer               |
| 203 | <i>Isodon tenuifolius</i> | Anticancer, NO inhibitor |
| 204 | <i>Isodon tenuifolius</i> | Anticancer               |
| 205 | <i>Isodon tenuifolius</i> | Anticancer               |
| 206 | <i>Isodon tenuifolius</i> | Anticancer               |
| 207 | <i>Isodon tenuifolius</i> | Anticancer               |



|     |                           |                           |
|-----|---------------------------|---------------------------|
| 208 | <i>Isodon tenuifolius</i> | Anticancer                |
| 209 | <i>Isodon tenuifolius</i> | Anticancer                |
| 210 | <i>Isodon tenuifolius</i> | Anticancer                |
| 211 | <i>Isodon tenuifolius</i> | Anticancer, NO inhibitor  |
| 212 | <i>Isodon tenuifolius</i> | Anticancer, NO inhibitor  |
| 213 | <i>Isodon tenuifolius</i> | NA                        |
| 214 | <i>Isodon tenuifolius</i> | Anticancer                |
| 215 | <i>Isodon tenuifolius</i> | Anticancer, NO inhibitor  |
| 216 | <i>Isodon tenuifolius</i> | NA                        |
| 217 | <i>Isodon tenuifolius</i> | NA                        |
| 218 | <i>Isodon tenuifolius</i> | Anticancer, NO inhibitor  |
| 219 | <i>Sideritis congesta</i> | NO, BchE, AchE inhibitors |
| 220 | <i>Sideritis congesta</i> | NO, BchE, AchE inhibitors |
| 221 | <i>Sideritis congesta</i> | NO, BchE, AchE inhibitors |
| 222 | <i>Sideritis congesta</i> | NO, BchE, AchE inhibitors |
| 223 | <i>Sideritis congesta</i> | NO, BchE, AchE inhibitors |
| 224 | <i>Sideritis congesta</i> | NO, BchE, AchE inhibitors |
| 225 | <i>Sideritis congesta</i> | NO, BchE, AchE inhibitors |
| 226 | <i>Sideritis congesta</i> | NO, BchE, AchE inhibitors |
| 227 | <i>Sideritis congesta</i> | NO, BchE, AchE inhibitors |
| 228 | <i>Isodon sinuolata</i>   | Anticancer                |
| 229 | <i>Isodon sinuolata</i>   | Anticancer                |
| 230 | <i>Isodon sinuolata</i>   | NA                        |
| 231 | <i>Isodon sinuolata</i>   | NA                        |
| 232 | <i>Isodon sinuolata</i>   | Anticancer                |
| 233 | <i>Isodon sinuolata</i>   | Anticancer                |
| 234 | <i>Isodon sinuolata</i>   | NA                        |
| 235 | <i>Isodon sinuolata</i>   | NA                        |
| 236 | <i>Isodon sinuolata</i>   | NA                        |
| 237 | <i>Isodon sinuolata</i>   | Anticancer                |
| 238 | <i>Isodon sinuolata</i>   | NA                        |
| 239 | <i>Isodon sinuolata</i>   | NA                        |
| 240 | <i>Isodon sinuolata</i>   | NA                        |
| 241 | <i>Isodon sinuolata</i>   | Anticancer                |
| 242 | <i>Isodon sinuolata</i>   | Anticancer                |
| 243 | <i>Isodon sinuolata</i>   | Anticancer                |
| 244 | <i>Isodon sinuolata</i>   | Anticancer                |
| 245 | <i>Isodon sinuolata</i>   | Anticancer                |
| 246 | <i>Isodon sinuolata</i>   | Anticancer                |
| 247 | <i>Isodon sinuolata</i>   | Anticancer                |
| 248 | <i>Isodon sinuolata</i>   | Anticancer                |
| 249 | <i>Isodon sinuolata</i>   | Anticancer                |

|     |                                |               |
|-----|--------------------------------|---------------|
| 250 | <i>Isodon sinuolata</i>        | NT            |
| 251 | <i>Isodon sinuolata</i>        | NT            |
| 252 | <i>Geopyxis. Sp</i>            | NT            |
| 253 | <i>Geopyxis. Sp</i>            | Anticancer    |
| 254 | <i>Geopyxis. Sp</i>            | NA            |
| 255 | <i>Geopyxis. Sp</i>            | NA            |
| 256 | <i>Geopyxis. Sp</i>            | NA            |
| 257 | <i>Geopyxis. Sp</i>            | NA            |
| 258 | <i>Geopyxis. Sp</i>            | Anticancer    |
| 259 | <i>Geopyxis. Sp</i>            | Anticancer    |
| 260 | <i>Geopyxis. Sp</i>            | Anticancer    |
| 261 | <i>Geopyxis. Sp</i>            | Anticancer    |
| 262 | <i>Geopyxis. Sp</i>            | NA            |
| 263 | <i>Geopyxis. Sp</i>            | Anticancer    |
| 264 | <i>Geopyxis. Sp</i>            | NA            |
| 265 | <i>Geopyxis. Sp</i>            | Anticancer    |
| 266 | <i>Geopyxis. Sp</i>            | Anticancer    |
| 267 | <i>Isodon japonicus</i>        | NO inhibitors |
| 268 | <i>Isodon japonicus</i>        | NO inhibitors |
| 269 | <i>Isodon japonicus</i>        | NO inhibitors |
| 270 | <i>Isodon japonicus</i>        | NO inhibitors |
| 271 | <i>Isodon japonicus</i>        | NO inhibitors |
| 272 | <i>Isodon japonicus</i>        | NO inhibitors |
| 273 | <i>Isodon japonicus</i>        | NO inhibitors |
| 274 | <i>Isodon japonicus</i>        | NO inhibitors |
| 275 | <i>Isodon japonicus</i>        | NO inhibitors |
| 276 | <i>Isodon japonicus</i>        | NO inhibitors |
| 277 | <i>Isodon japonicus</i>        | NO inhibitors |
| 278 | <i>Isodon japonicus</i>        | NO inhibitors |
| 279 | <i>Isodon japonicus</i>        | NO inhibitors |
| 280 | <i>Isodon japonicus</i>        | NO inhibitors |
| 281 | <i>Isodon japonicus</i>        | NO inhibitors |
| 282 | <i>Sideritis arguta</i>        | NA            |
| 283 | <i>Sideritis arguta</i>        | NT            |
| 284 | <i>Sideritis arguta</i>        | NA            |
| 285 | <i>Sideritis arguta</i>        | NA            |
| 286 | <i>Sideritis arguta</i>        | Anticancer    |
| 287 | <i>Sideritis arguta</i>        | NA            |
| 288 | <i>Jungermania atrobrunnea</i> | NT            |
| 289 | <i>Jungermania atrobrunnea</i> | NT            |
| 290 | <i>Jungermania atrobrunnea</i> | NT            |
| 291 | <i>Jungermania atrobrunnea</i> | NT            |

|     |                                         |            |
|-----|-----------------------------------------|------------|
| 292 | <i>Jungermania atrobrunnea</i>          | NT         |
| 293 | <i>Jungermania atrobrunnea</i>          | NT         |
| 294 | <i>Jungermania atrobrunnea</i>          | NT         |
| 295 | <i>Jungermania atrobrunnea</i>          | NT         |
| 296 | <i>Jungermania atrobrunnea</i>          | NT         |
| 297 | <i>Jungermania atrobrunnea</i>          | NT         |
| 298 | <i>Isodon nervosus</i>                  | NT         |
| 299 | <i>Isodon nervosus</i>                  | Anticancer |
| 300 | <i>Isodon nervosus</i>                  | NT         |
| 301 | <i>Isodon nervosus</i>                  | NT         |
| 302 | <i>Isodon nervosus</i>                  | NT         |
| 303 | <i>Isodon nervosus</i>                  | NT         |
| 304 | <i>Isodon nervosus</i>                  | NT         |
| 305 | <i>Isodon nervosus</i>                  | NT         |
| 306 | <i>Isodon nervosus</i>                  | NT         |
| 307 | <i>Isodon nervosus</i>                  | NT         |
| 308 | <i>Isodon nervosus</i>                  | Anticancer |
| 309 | <i>Isodon nervosus</i>                  | NT         |
| 310 | <i>Isodon nervosus</i>                  | NT         |
| 311 | <i>Isodon nervosus</i>                  | NT         |
| 312 | <i>Isodon nervosus</i>                  | NT         |
| 313 | <i>Isodon nervosus</i>                  | Anticancer |
| 314 | <i>Isodon nervosus</i>                  | Anticancer |
| 315 | <i>Isodon nervosus</i>                  | NT         |
| 316 | <i>Isodon nervosus</i>                  | NT         |
| 317 | <i>Isodon nervosus</i>                  | Anticancer |
| 318 | <i>Isodon albopilosus</i>               | NT         |
| 319 | <i>Isodon albopilosus</i>               | NT         |
| 320 | <i>Isodon albopilosus</i>               | NT         |
| 321 | <i>Isodon albopilosus</i>               | NT         |
| 322 | <i>Isodon albopilosus</i>               | NT         |
| 323 | <i>Isodon albopilosus</i>               | NT         |
| 324 | <i>Isodon albopilosus</i>               | NT         |
| 325 | <i>Isodon albopilosus</i>               | NT         |
| 326 | <i>Isodon albopilosus</i>               | NT         |
| 327 | <i>Isodon albopilosus</i>               | NT         |
| 328 | <i>Isodon albopilosus</i>               | NT         |
| 329 | <i>Isodon albopilosus</i>               | NT         |
| 330 | <i>Isodon albopilosus</i>               | NT         |
| 331 | <i>Isodon albopilosus</i>               | NT         |
| 332 | <i>Isodon albopilosus</i>               | NT         |
| 333 | <i>Isodon rubescens var. lushiensis</i> | NA         |

|     |                                         |            |
|-----|-----------------------------------------|------------|
| 334 | <i>Isodon rubescens var. lushiensis</i> | NA         |
| 335 | <i>Isodon rubescens var. lushiensis</i> | NA         |
| 336 | <i>Isodon rubescens var. lushiensis</i> | Anticancer |
| 337 | <i>Isodon rubescens var. lushiensis</i> | NA         |
| 338 | <i>Isodon rubescens var. lushiensis</i> | NA         |
| 339 | <i>Isodon rubescens var. lushiensis</i> | NA         |
| 340 | <i>Isodon rubescens var. lushiensis</i> | Anticancer |
| 341 | <i>Isodon rubescens var. lushiensis</i> | NA         |
| 342 | <i>Isodon rubescens var. lushiensis</i> | NA         |
| 343 | <i>Isodon rubescens var. lushiensis</i> | Anticancer |
| 344 | <i>Isodon rubescens var. lushiensis</i> | Anticancer |
| 345 | <i>Isodon rubescens var. lushiensis</i> | Anticancer |
| 346 | <i>Isodon rubescens var. lushiensis</i> | Anticancer |
| 347 | <i>Isodon rubescens var. lushiensis</i> | Anticancer |
| 348 | <i>Isodon rubescens var. lushiensis</i> | Anticancer |
| 349 | <i>Isodon rubescens var. lushiensis</i> | Anticancer |
| 350 | <i>Isodon rubescens var. lushiensis</i> | Anticancer |
| 351 | <i>Isodon rubescens var. lushiensis</i> | Anticancer |
| 352 | <i>Isodon rubescens var. lushiensis</i> | Anticancer |
| 353 | <i>Isodon rubescens var. lushiensis</i> | NA         |
| 354 | <i>Isodon rubescens var. lushiensis</i> | NA         |
| 355 | <i>Isodon rubescens var. lushiensis</i> | NA         |
| 356 | <i>Isodon rubescens var. lushiensis</i> | NA         |
| 357 | <i>Isodon pharicus</i>                  | NT         |
| 358 | <i>Isodon pharicus</i>                  | Anticancer |
| 359 | <i>Isodon pharicus</i>                  | NA         |
| 360 | <i>Isodon pharicus</i>                  | NT         |
| 361 | <i>Isodon pharicus</i>                  | NA         |
| 362 | <i>Isodon pharicus</i>                  | Anticancer |
| 363 | <i>Isodon pharicus</i>                  | Anticancer |
| 364 | <i>Isodon pharicus</i>                  | Anticancer |
| 365 | <i>Isodon pharicus</i>                  | Anticancer |
| 366 | <i>Isodon pharicus</i>                  | Anticancer |
| 367 | <i>Isodon pharicus</i>                  | NT         |
| 368 | <i>Isodon pharicus</i>                  | NT         |
| 369 | <i>Isodon pharicus</i>                  | NT         |
| 370 | <i>Isodon pharicus</i>                  | Anticancer |
| 371 | <i>Isodon pharicus</i>                  | NA         |
| 372 | <i>Isodon pharicus</i>                  | Anticancer |
| 373 | <i>Isodon pharicus</i>                  | NA         |
| 374 | <i>Isodon pharicus</i>                  | Anticancer |
| 375 | <i>Isodon pharicus</i>                  | Anticancer |

|     |                                        |            |
|-----|----------------------------------------|------------|
| 376 | <i>Isodon pharicus</i>                 | NA         |
| 377 | <i>Isodon pharicus</i>                 | NA         |
| 378 | <i>Isodon pharicus</i>                 | Anticancer |
| 379 | <i>Isodon pharicus</i>                 | Anticancer |
| 380 | <i>Isodon pharicus</i>                 | Anticancer |
| 381 | <i>Isodon pharicus</i>                 | NA         |
| 382 | <i>Isodon sculponeatus</i>             | Anticancer |
| 383 | <i>Isodon sculponeatus</i>             | Anticancer |
| 384 | <i>Isodon sculponeatus</i>             | NA         |
| 385 | <i>Isodon sculponeatus</i>             | NA         |
| 386 | <i>Isodon sculponeatus</i>             | NA         |
| 387 | <i>Isodon sculponeatus</i>             | NA         |
| 388 | <i>Isodon sculponeatus</i>             | Anticancer |
| 389 | <i>Isodon sculponeatus</i>             | NA         |
| 390 | <i>Isodon sculponeatus</i>             | NA         |
| 391 | <i>Isodon sculponeatus</i>             | Anticancer |
| 392 | <i>Isodon sculponeatus</i>             | Anticancer |
| 393 | <i>Isodon sculponeatus</i>             | Anticancer |
| 394 | <i>Isodon sculponeatus</i>             | Anticancer |
| 395 | <i>Isodon sculponeatus</i>             | Anticancer |
| 396 | <i>Isodon sculponeatus</i>             | Anticancer |
| 397 | <i>Isodon sculponeatus</i>             | Anticancer |
| 398 | <i>Isodon sculponeatus</i>             | NA         |
| 399 | <i>Isodon sculponeatus</i>             | NT         |
| 400 | <i>Isodon eriocalyx var. laxiflora</i> | Anticancer |
| 401 | <i>Isodon eriocalyx var. laxiflora</i> | Anticancer |
| 402 | <i>Isodon eriocalyx var. laxiflora</i> | Anticancer |
| 403 | <i>Isodon eriocalyx var. laxiflora</i> | NA         |
| 404 | <i>Isodon eriocalyx var. laxiflora</i> | NT         |
| 405 | <i>Isodon eriocalyx var. laxiflora</i> | Anticancer |
| 406 | <i>Isodon phyllostachys</i>            | NA         |
| 407 | <i>Isodon phyllostachys</i>            | NA         |
| 408 | <i>Isodon phyllostachys</i>            | NA         |
| 409 | <i>Isodon phyllostachys</i>            | NA         |
| 410 | <i>Isodon phyllostachys</i>            | NA         |
| 411 | <i>Isodon phyllostachys</i>            | NA         |
| 412 | <i>Isodon phyllostachys</i>            | NA         |
| 413 | <i>Isodon phyllostachys</i>            | NA         |
| 414 | <i>Isodon phyllostachys</i>            | NA         |
| 415 | <i>Isodon phyllostachys</i>            | NA         |
| 416 | <i>Isodon phyllostachys</i>            | NA         |
| 417 | <i>Isodon phyllostachys</i>            | NA         |

|     |                                        |            |
|-----|----------------------------------------|------------|
| 418 | <i>Isodon phyllostachys</i>            | NA         |
| 419 | <i>Isodon phyllostachys</i>            | NA         |
| 420 | <i>Isodon phyllostachys</i>            | NA         |
| 421 | <i>Isodon eriocalyx var. laxiflora</i> | NA         |
| 422 | <i>Isodon eriocalyx var. laxiflora</i> | NA         |
| 423 | <i>Isodon eriocalyx var. laxiflora</i> | NA         |
| 424 | <i>Isodon eriocalyx var. laxiflora</i> | NA         |
| 425 | <i>Isodon eriocalyx var. laxiflora</i> | NA         |
| 426 | <i>Isodon eriocalyx var. laxiflora</i> | NA         |
| 427 | <i>Isodon eriocalyx var. laxiflora</i> | NA         |
| 428 | <i>Isodon eriocalyx var. laxiflora</i> | Anticancer |
| 429 | <i>Isodon eriocalyx var. laxiflora</i> | NA         |
| 577 | <i>Isodon nervosus</i>                 | Anticancer |
| 431 | <i>Isodon rubescens</i>                | Anticancer |
| 432 | <i>Isodon rubescens</i>                | NA         |
| 433 | <i>Isodon rubescens</i>                | NA         |
| 434 | <i>Isodon rubescens</i>                | Anticancer |
| 435 | <i>Isodon rubescens</i>                | NA         |
| 436 | <i>Isodon rubescens</i>                | Anticancer |
| 437 | <i>Isodon rubescens</i>                | Anticancer |
| 438 | <i>Isodon rubescens</i>                | Anticancer |
| 439 | <i>Isodon rubescens</i>                | Anticancer |
| 440 | <i>Isodon rubescens</i>                | Anticancer |
| 441 | <i>Isodon rosthorni</i>                | NA         |
| 442 | <i>Isodon rosthorni</i>                | NA         |
| 443 | <i>Isodon rosthorni</i>                | NA         |
| 444 | <i>Isodon rosthorni</i>                | NA         |
| 445 | <i>Isodon rosthorni</i>                | Anticancer |
| 446 | <i>Isodon rosthorni</i>                | Anticancer |
| 447 | <i>Isodon rosthorni</i>                | Anticancer |
| 448 | <i>Isodon rosthorni</i>                | NA         |
| 449 | <i>Isodon rosthorni</i>                | NA         |
| 450 | <i>Isodon parvifolius</i>              | NA         |
| 451 | <i>Isodon parvifolius</i>              | Anticancer |
| 452 | <i>Isodon parvifolius</i>              | NT         |
| 453 | <i>Isodon henryi</i>                   | NT         |
| 454 | <i>Isodon henryi</i>                   | NT         |
| 455 | <i>Isodon henryi</i>                   | NT         |
| 456 | <i>Isodon henryi</i>                   | NT         |
| 457 | <i>Isodon henryi</i>                   | NT         |
| 458 | <i>Isodon henryi</i>                   | NT         |
| 459 | <i>Isodon henryi</i>                   | NT         |

|     |                            |            |
|-----|----------------------------|------------|
| 460 | <i>Isodon henryi</i>       | NT         |
| 461 | <i>Isodon henryi</i>       | NT         |
| 462 | <i>Isodon henryi</i>       | NT         |
| 463 | <i>Isodon henryi</i>       | NT         |
| 464 | <i>Isodon henryi</i>       | NT         |
| 465 | <i>Isodon henryi</i>       | NT         |
| 466 | <i>Isodon japonicus</i>    | NT         |
| 467 | <i>Isodon japonicus</i>    | NT         |
| 468 | <i>Isodon japonicus</i>    | NT         |
| 469 | <i>Isodon japonicus</i>    | NT         |
| 470 | <i>Isodon japonicus</i>    | NT         |
| 471 | <i>Isodon japonicus</i>    | NT         |
| 472 | <i>Isodon japonicus</i>    | NT         |
| 473 | <i>Isodon japonicus</i>    | NT         |
| 474 | <i>Isodon japonicus</i>    | NT         |
| 475 | <i>Isodon japonicus</i>    | NT         |
| 476 | <i>Isodon japonicus</i>    | NT         |
| 477 | <i>Isodon japonicus</i>    | NT         |
| 478 | <i>Isodon japonicus</i>    | NT         |
| 479 | <i>Isodon japonicus</i>    | NT         |
| 480 | <i>Isodon japonicus</i>    | NT         |
| 481 | <i>Isodon japonicus</i>    | NT         |
| 482 | <i>Isodon japonicus</i>    | NT         |
| 483 | <i>Isodon japonicus</i>    | NT         |
| 484 | <i>Isodon japonicus</i>    | NT         |
| 485 | <i>Isodon japonicus</i>    | NT         |
| 486 | <i>Isodon rubescens</i>    | NT         |
| 487 | <i>Isodon rubescens</i>    | NT         |
| 488 | <i>Isodon rubescens</i>    | NT         |
| 489 | <i>Isodon rubescens</i>    | Anticancer |
| 490 | <i>Isodon rubescens</i>    | Anticancer |
| 491 | <i>Isodon rubescens</i>    | NT         |
| 492 | <i>Isodon rubescens</i>    | NT         |
| 493 | <i>Isodon rubescens</i>    | NT         |
| 494 | <i>Rabdosia rubescens</i>  | NT         |
| 495 | <i>Rabdosia rubescens</i>  | NT         |
| 496 | <i>Isodon scoparius</i>    | NA         |
| 497 | <i>Isodon scoparius</i>    | NA         |
| 498 | <i>Isodon scoparius</i>    | Anticancer |
| 499 | <i>Isodon scoparius</i>    | NT         |
| 500 | <i>Isodon sculponeatus</i> | Anticancer |
| 501 | <i>Isodon sculponeatus</i> | Anticancer |

|     |                               |            |
|-----|-------------------------------|------------|
| 502 | <i>Isodon sculponeatus</i>    | NT         |
| 503 | <i>Isodon sculponeatus</i>    | Anticancer |
| 504 | <i>Isodon sculponeatus</i>    | NT         |
| 505 | <i>Isodon sculponeatus</i>    | Anticancer |
| 506 | <i>Isodon sculponeatus</i>    | Anticancer |
| 507 | <i>Isodon sculponeatus</i>    | NT         |
| 508 | <i>Isodon sculponeatus</i>    | NT         |
| 509 | <i>Isodon sculponeatus</i>    | NT         |
| 510 | <i>Isodon sculponeatus</i>    | NT         |
| 511 | <i>Isodon sculponeatus</i>    | NT         |
| 512 | <i>Isodon sculponeatus</i>    | NT         |
| 513 | <i>Isodon sculponeatus</i>    | NT         |
| 514 | <i>Isodon sculponeatus</i>    | Anticancer |
| 515 | <i>Isodon sculponeatus</i>    | NT         |
| 516 | <i>Isodon sculponeatus</i>    | NT         |
| 517 | <i>Isodon sculponeatus</i>    | NT         |
| 518 | <i>Isodon sculponeatus</i>    | Anticancer |
| 519 | <i>Isodon sculponeatus</i>    | NT         |
| 520 | <i>Isodon japonica</i>        | NT         |
| 521 | <i>Isodon japonica</i>        | NT         |
| 522 | <i>Casearia sylvestris</i>    | NT         |
| 523 | <i>Casearia sylvestris</i>    | NT         |
| 524 | <i>Casearia sylvestris</i>    | NT         |
| 525 | <i>Siegesbeckia pubescens</i> | NT         |
| 526 | <i>Siegesbeckia pubescens</i> | NT         |
| 527 | <i>Siegesbeckia pubescens</i> | NT         |
| 528 | <i>Siegesbeckia pubescens</i> | NT         |
| 529 | <i>Siegesbeckia pubescens</i> | NT         |
| 530 | <i>Siegesbeckia pubescens</i> | NT         |
| 531 | <i>Siegesbeckia pubescens</i> | NT         |
| 532 | <i>Siegesbeckia pubescens</i> | NT         |
| 533 | <i>Siegesbeckia pubescens</i> | NT         |
| 534 | <i>Siegesbeckia pubescens</i> | NT         |
| 535 | <i>Siegesbeckia pubescens</i> | NT         |
| 536 | <i>Siegesbeckia pubescens</i> | NT         |
| 537 | <i>Siegesbeckia pubescens</i> | NT         |
| 538 | <i>Siegesbeckia pubescens</i> | NT         |
| 539 | <i>Siegesbeckia pubescens</i> | NT         |
| 540 | <i>Siegesbeckia pubescens</i> | NT         |
| 541 | <i>Siegesbeckia pubescens</i> | NT         |
| 542 | <i>Siegesbeckia pubescens</i> | NT         |
| 543 | <i>Siegesbeckia pubescens</i> | NT         |



---

|     |                                                 |            |
|-----|-------------------------------------------------|------------|
| 544 | <i>Siegesbeckia pubescens</i>                   | NT         |
| 545 | <i>Siegesbeckia pubescens</i>                   | NT         |
| 546 | <i>Siegesbeckia pubescens</i>                   | NT         |
| 547 | <i>Siegesbeckia pubescens</i>                   | NT         |
| 548 | <i>Siegesbeckia pubescens</i>                   | NT         |
| 549 | <i>Siegesbeckia pubescens</i>                   | NT         |
| 550 | <i>Sagittaria trifolia</i> var. <i>sinensis</i> | NT         |
| 551 | <i>Sagittaria trifolia</i> var. <i>sinensis</i> | NT         |
| 552 | <i>Sagittaria trifolia</i> var. <i>sinensis</i> | NT         |
| 553 | <i>Sagittaria trifolia</i> var. <i>sinensis</i> | NT         |
| 554 | <i>Sagittaria trifolia</i> var. <i>sinensis</i> | NT         |
| 555 | <i>Sagittaria trifolia</i> var. <i>sinensis</i> | NT         |
| 556 | <i>Sagittaria trifolia</i> var. <i>sinensis</i> | NT         |
| 557 | <i>Sagittaria trifolia</i> var. <i>sinensis</i> | NT         |
| 558 | <i>Isodon macrophyllus</i>                      | NT         |
| 559 | <i>Isodon macrophyllus</i>                      | NT         |
| 560 | <i>Isodon xerophilus</i>                        | NT         |
| 561 | <i>Isodon xerophilus</i>                        | NT         |
| 562 | <i>Isodon xerophilus</i>                        | NT         |
| 563 | <i>Isodon xerophilus</i>                        | NT         |
| 564 | <i>Isodon xerophilus</i>                        | Anticancer |
| 565 | <i>Isodon macrophyllus</i>                      | NT         |
| 566 | <i>Isodon macrophyllus</i>                      | NT         |
| 567 | <i>Isodon macrophyllus</i>                      | NT         |
| 568 | <i>Isodon macrophyllus</i>                      | NT         |
| 569 | <i>Isodon macrophyllus</i>                      | NT         |
| 570 | <i>Isodon nervosus</i>                          | NT         |

NA (Not Active) are not active against tested cancer cell lines ( $IC_{50} > 50$ ) and NT (Not Tested) have no reported bioactivities.



[illegible]
